1 **A plastidial retrograde-signal potentiates biosynthesis of systemic stress response activators**

2

3 Liping Zeng<sup>1#</sup>, Jin-Zheng Wang<sup>1#</sup>, Xiang He<sup>2</sup>, Haiyan Ke<sup>1</sup>, Mark Lemos<sup>1</sup>, William M. Gray<sup>3</sup>,  
4 Katayoon Dehesh<sup>1\*</sup>

5

6 <sup>1</sup>Institute for Integrative Genome Biology and Department of Botany and Plant Sciences,  
7 University of California, Riverside, CA 92521

8 <sup>2</sup>Current address: Laboratory of Allergy and Inflammation, Chengdu third people's hospital  
9 branch of National Clinical Research Center for Respiratory Disease, Chengdu 610031, China

10 <sup>3</sup>Department of Plant and Microbial Biology, University of Minnesota, St. Paul, MN 55108

11

12 \*Author for correspondence:

13 *Katayoon Dehesh*

14 *Email: kdehesh@ucr.edu*

15 <sup>#</sup>The authors contributed equally to this work.

16

|                                                                                          |      |                                      |                                                          |
|------------------------------------------------------------------------------------------|------|--------------------------------------|----------------------------------------------------------|
| Total word count (including Introduction, Materials and Methods, Results and Discussion) | 6322 | No. of figures:                      | 9 (Figs 3, 5, 6, 9 in color)                             |
| Summary                                                                                  | 160  | No. of tables:                       | 0                                                        |
| Introduction                                                                             | 1256 | No. of Supporting Information files: | 16 (Fig. S1-S9; Table S1-S3; Supplemental data sets 1-4) |
| Materials and Methods:                                                                   | 1164 |                                      |                                                          |
| Results:                                                                                 | 2918 |                                      |                                                          |
| Discussion:                                                                              | 984  |                                      |                                                          |
| Acknowledgements:                                                                        | 94   |                                      |                                                          |

17

18

19

20

## 21 **Summary**

- 22 • Plants employ an array of intricate and hierarchical signaling cascades to perceive and  
23 transduce informational cues to synchronize and tailor adaptive responses. Systemic  
24 stress response (SSR) is a recognized complex signaling and response network  
25 quintessential to plant's local and distal responses to environmental triggers, however, the  
26 identity of the initiating signals has remained fragmented.
- 27 • Here, we show that both biotic (aphids and viral pathogens) and abiotic (high-light and  
28 wounding) stresses induce accumulation of the plastidial-retrograde-signaling metabolite,  
29 methylerythritol cyclodiphosphate (MEcPP), leading to reduction of the phytohormone,  
30 auxin, and the subsequent decreased expression of the phosphatase, *PP2C.D1*.
- 31 • This enables phosphorylation of mitogen-activated protein kinases (MAPK3/6), and the  
32 consequential induction of the downstream events ultimately resulting in biosynthesis of  
33 the two SSR priming metabolites, pipecolic- and N-hydroxy-pipecolic acid.
- 34 • This work identifies plastids as the initiation site, and the plastidial retrograde-signal,  
35 MEcPP as the initiator of a multi-component signaling cascade potentiating the  
36 biosynthesis of SSR activators, in response to biotic and abiotic triggers.

37

## 38 **Key Words:**

39 MAPK3/6, MEcPP, N-hydroxy-pipecolic acid, pipecolic acid, plastidial retrograde-signal,  
40 PP2C.D1

41

42

43

44

45

46

47

48

49

50

51

## 52 **Introduction**

53 Dynamic organization of strata of intertwined signaling circuitries is fundamental to the integrity  
54 of cellular homeostasis in response to informational cues. Stress responses are induced via  
55 intricate and highly organized tiers of signaling cascades where the deactivation/activation of one  
56 component potentiates interaction and function of another. Uncovering the nature, the  
57 organization, and the operational mode of these tiered communication networks is one of the  
58 prime challenges of biology.

59 A well-recognized key mechanism in the transduction of intracellular signals in eukaryotic  
60 organisms is transmission of information via posttranslational protein modifications, most  
61 notably reversible protein phosphorylation carried out by protein kinases and protein  
62 phosphatases. Protein phosphatases are classified into three groups, among them type 2C protein  
63 phosphatases (PP2Cs), a structurally unique class of  $Mg^{2+}$ -/ $Mn^{2+}$ -dependent enzymes (Olsen *et al.*  
64 *al.*, 2006; Moorhead *et al.*, 2007; Fuchs *et al.*, 2013). The Arabidopsis genome encodes eighty  
65 PP2Cs, nine of which belong to the D-subclade (Fuchs *et al.*, 2013). Initial computational  
66 analyses of PP2C.D proteins identified a putative bipartite nuclear localization signal in all nine  
67 family members together with a potential transmembrane spanning region in PP2C.D1, D3, D4,  
68 D6, D7, and D9 (Schweighofer *et al.*, 2004). Subsequent studies using protein-GFP reporters  
69 noted exclusive presence of PP2C.D2, D5, and D6 on the plasma membrane, detected D1, D3,  
70 and D4 in the nuclear and cytosolic compartments, and D8 in mitochondria (Ren *et al.*, 2018). In  
71 addition to the distinct localization patterns, phosphatases are implicated in different functions  
72 including regulation of apical hook development (Sentandreu *et al.*, 2011; Spartz *et al.*, 2014),  
73 auxin-induced cell expansion (Spartz *et al.*, 2014; Ren *et al.*, 2018; Wang, J *et al.*, 2020), leaf  
74 senescence (Xiao *et al.*, 2015), immune responses (Couto *et al.*, 2016), and altered intracellular  
75 responses to exogenous and endogenous stimulus via their nuclear/cytosolic interactions with  
76 mitogen-activated protein kinases (MAPKs) (Schweighofer *et al.*, 2007; Umbrasaitė *et al.*, 2010;  
77 Galletti *et al.*, 2011; Fuchs *et al.*, 2013).

78 In Arabidopsis MAPKs are divided into four (A-D) groups (Ichimura *et al.*, 2002). Group A  
79 includes MAPK3, MAPK6, and their orthologs, activated by phosphorylation in response to  
80 biotic and abiotic stimuli and by developmental cues (Kiegerl *et al.*, 2000; Zhang & Klessig,  
81 2001; Ichimura *et al.*, 2002; Seo *et al.*, 2007). Specifically, a range of stressors such as  
82 producers of reactive oxygen species (ROS) trigger MAPKs activity leading to their transport to

83 the nucleus where they reconfigure transcriptional landscape by phosphorylating transcription  
84 factors (Kovtun *et al.*, 2000; Miles *et al.*, 2005; Pitzschke & Hirt, 2009; Taj *et al.*, 2010).  
85 Intriguingly, the activation of MAPK3/6 result in the induction of selected stress-response genes,  
86 and block the action of auxin, thus providing a link between oxidative stress and auxin signal  
87 transduction (Kovtun *et al.*, 2000).

88 Auxin [indole-3-acetic acid (IAA)] is an indispensable morpho-regulatory hormone involved in  
89 integration of developmental and environmental signals into a complex regulatory network  
90 permitting optimal architectural modifications in response to the prevailing conditions (Gil *et al.*,  
91 2001; Cheong *et al.*, 2002; Navarro *et al.*, 2006; Spaepen *et al.*, 2007; Kazan & Manners, 2009).  
92 As such, auxin homeostasis is key to refinement of plant responses to an array of environmental  
93 signals such as ROS (Laskowski *et al.*, 2002; Zhong *et al.*, 2010; Tognetti *et al.*, 2012; Yu *et al.*,  
94 2013). Interestingly, the proposed connection between auxin and plastid-to-nucleus (retrograde)  
95 signaling implied primary function of plastidial retrograde signal in auxin-based signaling  
96 cascade (Glasser *et al.*, 2014). Indeed, recently the methylerythritol phosphate (MEP)-pathway  
97 intermediate, methylerythritol cyclodiphosphate (MEcPP), was identified as the stress-specific  
98 retrograde signaling metabolite, modulating growth by reducing the abundance of auxin and its  
99 transporter PIN1 via dual transcriptional and posttranslational regulatory inputs in response to  
100 abiotic stresses (Jiang *et al.*, 2018). The connection provided solid evidence for the primary role  
101 of plastids in establishing a balance between plant growth and stress responses in accordance to  
102 the prevailing conditions (Jiang *et al.*, 2018; Jiang *et al.*, 2019; Jiang *et al.*, 2020). In addition,  
103 auxin is also a known key constituent of the phytohormone-based signaling network mediating  
104 the regulation of defense responses, as evident by the suppression of the majority of the auxin  
105 responsive genes after induction of systemic acquired resistance (SAR) (Wang *et al.*, 2007;  
106 Verma *et al.*, 2016).

107 Whole plant immunity, coined SAR, is the process of priming defense responses in leaves distal  
108 to the local infection (Hunt *et al.*, 1996; Ryals *et al.*, 1996). This process is central to a broad-  
109 spectrum immunity protecting plants from immediate and future biotic attacks (Pieterse *et al.*,  
110 2009; Leon-Reyes *et al.*, 2010; Spoel & Dong, 2012). However, pathogens are not unique in  
111 their ability to elicit systemic signals, since abiotic stresses also induce the rapidly transmitted  
112 systemic signal(s) from local to distal leaves, a response known as systemic acquired acclimation  
113 (SAA), key to acclimatory responses and improved tolerance (Karpinski *et al.*, 1999; Czarnocka



114 *et al.*, 2020; Zandalinas *et al.*, 2020). It is of note that both SAR and SAA, the two seemingly  
115 independent systemic responses, are triggered by common stress signals such as ROS (Baxter *et*  
116 *al.*, 2014). This is to be expected since the establishment of SAR is not independent of abiotic  
117 cues such as light (Zeier *et al.*, 2004), suggestive of overlapping regulatory components between  
118 the two networks.

119 Long distance communication and signal amplification of SAR is triggered by a number of  
120 mobile metabolites including salicylic acid (SA), methyl salicylate (MeSA), a lipid-transfer  
121 protein designated defective in induced resistance, azelaic acid, glycerol-3-phosphate, pipercolic  
122 acid (Pip) and its derivative N-hydroxy-pipercolic acid (NHP) (Jung *et al.*, 2009; Chanda *et al.*,  
123 2011; Navarova *et al.*, 2012; Chen *et al.*, 2018). Specifically, Pip and NHP are noted signaling  
124 molecules that control both SA-dependent and SA-independent SAR activation, and are  
125 indispensable for the establishment of nearly all the respective transcriptional responses  
126 (Bernsdorff *et al.*, 2016). Pip is synthesized by the agd2-like defense response protein1 (ALD1)  
127 (Navarova *et al.*, 2012; Ding *et al.*, 2016; Hartmann *et al.*, 2017). Subsequent N-hydroxylation of  
128 Pip by flavin-dependent monooxygenase 1 (FMO1) results in formation of NHP (Chen *et al.*,  
129 2018; Hartmann, M. *et al.*, 2018). Ultimately, elevation of Pip and NHP levels enable the  
130 establishment of SAR associated priming responses (Navarova *et al.*, 2012; Zeier, 2013; Ding *et*  
131 *al.*, 2016; Chen *et al.*, 2018). Interestingly however, a recent study shows that FMO1 also plays  
132 an important role in triggering of an SAA response, supporting the notion that SAA and SAR not  
133 only respond to the same triggers, but also share part or all steps of the same signaling pathway(s)  
134 (Baxter *et al.*, 2014; Czarnocka *et al.*, 2020).

135 Despite numerous reports on the establishment of systemic signaling, the identity and the  
136 complexity of the initiating signals potentiating this key defense/adaptive mechanism remains  
137 elusive. Here, the exploitation of genetically manipulated lines that either inducibly or  
138 constitutively (*ceh1* mutant) accumulate MEcPP, together with biotically and abiotically stressed  
139 plants accumulating MEcPP, aided us to uncover the organizational sequence and the mode of  
140 MEcPP-mediated action in potentiating a multi-component cascade responsible for the  
141 production metabolites that trigger a general systemic signaling responses (SSR). The sequence  
142 of these events commences by MEcPP-mediated reduction of auxin abundance and the  
143 consequential decreased expression of auxin response factors (*ARFs*), the transcriptional

144 activators of *PP2C.D1*. The resulting reduction of *PP2C.D1* transcripts enables phosphorylation  
145 of MAPK3 and 6, and the consequential induction of events leading to biosynthesis of Pip and  
146 NHP, the two key activators of SSR triggered by abiotic (wounding and high light) and biotic  
147 (aphid and a vital pathogen) stresses.

148 Collectively our finding establishes MEcPP as an initiator of the SSR to defend plants against a  
149 myriad of environmental challenges.

## 150 **Materials and Methods**

### 151 **Plant material and growth condition**

152 *Arabidopsis thaliana* seedlings were grown in 16-h light/8-h dark cycles at ~22 °C. Two-week-  
153 old seedling were treated with DEX, MEcPP (100 µM), IAA (10 µM, 1hr), Luciferase (1mM),  
154 high light (800 µmol m<sup>-2</sup>sec<sup>-1</sup>) or wounded by forceps as described previously (Benn *et al.*, 2016;  
155 Jiang *et al.*, 2018). The *pp2c* mutant (SALK\_099356) was obtained from TAIR. Seedlings were  
156 grown under 12h light photoperiod at 22-24 °C for aphids infestation.

### 157 **Phylogenetic analyses**

158 Protein sequences of PP2C Clade-D family (Xue *et al.*, 2008) were downloaded from Phytozome.  
159 The software MEGA (Kumar *et al.*, 2018) and PhyML (Guindon *et al.*, 2010) was performed to  
160 construct the phylogeny.

### 161 **Luciferase-Activity quantification**

162 Luciferase activity signals were detected by a CCD camera (Wang *et al.*, 2014). Quantification  
163 and statistical analyses of *RSRE:LUC* activity were performed (Benn *et al.*, 2014).

### 164 **Metabolites extraction and analyses**

165 MEcPP, IAA and Salicylic acid were analyzed as previously described (Jiang *et al.*, 2019).

166 Pip measurements were performed using a Dionex Ultimate 3000 binary RSLC system coupled  
167 to Thermo Q-Exactive Focus mass spectrometer with a heated electro spray ionization source.  
168 Plant samples were separated using an Accucore-150-Amide-HILIC column (150 X 2.1 mm;  
169 particle size 2.6µM; Thermo Scientific 16726-152130) with a guard column containing the same  
170 column matrix (Thermo Scientific 852-00; 16726-012105). Gradient elution was carried out with

171 acetonitrile (A) and 10 mM ammonium acetate pH 7.0 (B). The separation was conducted using  
172 the gradient profile ( $t$  (min), %A, %B): (-2, 90, 10), (0, 90, 10), (12, 30, 70), (15, 30, 70), (16, 90,  
173 10), (22, 90, 10). The flow rate was kept at 280  $\mu\text{L}/\text{min}$  and the injected volume was 2  $\mu\text{L}$ . The  
174 column was kept at 35  $^{\circ}\text{C}$ . Mass spectra were acquired in positive mode under the following  
175 parameters: spray voltage, 4.50 KV; sheath gas flow rate 50, auxiliary gas flow rate 14, sweep  
176 gas flow rate 2, capillary temperature of 275  $^{\circ}\text{C}$ , S-lens RF level 100 and auxiliary gas heater  
177 temperature 275  $^{\circ}\text{C}$ . The initial 0.5 min of each run was sent to waste to avoid salt contamination  
178 of the MS. Compounds of interest were identified by accurate mass measurements (MS1),  
179 retention time and mass transitions monitoring. Pip was identified by using standard (Sigma,  
180 P45850). For relative quantitation, peak area for each compound (MS1; Thermo Trace Finder  
181 Software) was normalized to the initial fresh weight mass.

182 *N*-OH-Pip was measured using the same system as Pip measurements. Plant samples were  
183 separated by an Acquity UPLC HSS T3 column (1.8- $\mu\text{m}$ , 150 X 2.1 mm) (Waters, part #  
184 186003539). The mobile phases were A (ACN, 0.1% FA) and B (water, 0.1% FA), and the  
185 gradient was implemented at a flowrate of 0.2 mL/min (percentages indicate percent B): 0-1 min  
186 (99%), 1-8 min (99-50%), 8-10 min (50%), 10-10.5 min (50-99%), and 10.5-13 min (99%). The  
187 column was kept at 35  $^{\circ}\text{C}$ . The MS was run in positive ion mode with the following parameters:  
188 spray voltage, 4.50 KV; sheath gas flow rate 45, auxiliary gas flow rate 20, sweep gas flow rate 2,  
189 capillary temperature of 250  $^{\circ}\text{C}$ , S-lens RF level 50 and auxiliary gas heater temperature 250  $^{\circ}\text{C}$ .  
190 The initial 1 min of each run was sent to waste to avoid salt contamination of the MS. NHP was  
191 accurately identified by using the standard obtained from Professor Elizabeth Sattely's lab at  
192 Stanford university, and by accurate mass measurements (MS1), retention time and mass  
193 transitions. For relative quantitation, peak area for each compound (MS1; Thermo Trace Finder  
194 Software) was normalized to the initial fresh weight mass.

### 195 **RNA-seq Analysis**

196 Two-week-old *A. thaliana* seedlings were collected. RNA-seq libraries construction followed the  
197 BrAD-seq method (Townsend *et al.*, 2015). Each genotype has six biological replicates. 75bases  
198 of single-end reads were sequenced. Tophat2 (Kim *et al.*, 2013) was used to map reads to the  
199 genome of *A. thaliana*. DESeq2 (Love *et al.*, 2014) was used to count and normalize mapped  
200 reads. Genes with 2-fold altered expression levels and p-value  $\leq 0.05$  were identified as

201 differentially expressed genes. The GO term enrichment analyses were obtained by agriGOv2,  
202 and the heatmap was generated by the pheatmap (Kolde & Kolde, 2015) in R program (Team,  
203 2013) (Table S2). RNA-seq data of SAR and Pip response genes were downloaded from  
204 published (Hartmann *et al.*, 2017). List of genes with RSRE-containing promoters were obtained  
205 from published (Benn *et al.*, 2016).

### 206 **Quantification of gene expression**

207 RT-qPCR was performed as described previously (Walley *et al.*, 2007). The control genes was  
208 AT4G26410. Table S3 listed primer sequences.

### 209 **Agro-infiltration-based transient assays in *Nicotiana benthamiana***

210 *N. benthamiana* transient assay was used to identify the protein-protein interaction between  
211 *PP2C* and *MAPK3*, and *MAPK6*. pENTR/D-TOPO (Invitrogen) and Gateway systems were used  
212 for constructing vectors. Vectors containing C/N-terminal luciferase fused with *PP2C*, *MAPK3*  
213 and *MAPK6* were introduced into *Agrobacterium* GV3101 and subsequently used for infiltration  
214 of *N. benthamiana* leaves, followed by luciferase activity signal detection using CCD camera  
215 (Wang *et al.*, 2014).

### 216 **Co-Immunoprecipitation**

217 Two-week-old seedlings were ground in liquid nitrogen and suspended in 2x extraction buffer  
218 (50 mM Tris-HCl at pH 7.5, 150 mM NaCl, 10% glycerol, 0.1% NP-40, protease inhibitor  
219 cocktail and phosphatase inhibitor) at 4 °C for 30 min. The protein suspensions were then  
220 centrifuged at 4,000g for 10 min and filtered out the precipitation using the 100 µm Nylon Mesh.  
221 The supernatant was incubated with GFP-Trap magnetic beads (for IP) and bmb-20 (negative  
222 control) (Chromotek), respectively, for 2 h at 4 °C. The beads were washed five times with the 2x  
223 extraction buffer. The immuno-precipitants were eluted with 2x SDS lysis buffer (50 mM Tris-  
224 HCl at pH 6.8, 2% SDS, 10% glycerol, 0.1% bromophenol blue, 1% 2-mercaptoethanol), boiled  
225 (100 °C, 10 min), separated on SDS-PAGE gel and subsequently transferred onto nitrocellulose  
226 membrane for probing with the corresponding antibodies.

### 227 **Protein extraction and immuno-blot analyses**

228 Two-week-old seedlings were ground in liquid nitrogen and suspended in 2x SDS lysis buffer

229 and boiled (100 °C, 10 min). Proteins were then separated on SDS-PAGE gel and transferred  
230 onto the nitrocellulose membrane. The monoclonal anti-PP2C (1:5000) was previously reported  
231 (Spartz *et al.*, 2014). The phosphorylated MAPK3 and MAPK6 proteins were detected using  
232 polyclonal anti-phospho-p44/42 MAPK (Erk1/2, 1:1000; Cell Signaling Technology), and the  
233 detection of the total MAPK3 and 6 protein levels were by using polyclonal anti-MAPK3  
234 (1:1000, Sigma) and anti-MAPK6 (1:1000, Sigma). The goat-anti-Rabbit (1:3000) HRP-  
235 conjugated secondary antibody was used.

### 236 **Aphid infestation**

237 The potato aphids (*Macrosiphum euphorbiae*) isolate WU11 (Teixeira *et al.*, 2018) were  
238 maintained on their adapted hosts for over 2.5 years in a growth chamber at 20°C with 16h light  
239 photoperiod. To infest new Arabidopsis seedlings, the colony was released to the growth  
240 chamber with the experimental plants to allow the infestation (Teixeira *et al.*, 2018).

### 241 **Viral infection**

242 Four-week-old seedlings were infected with *cucumber mosaic virus (CMV-m2b)* for 2 weeks.

### 243 **Accession Numbers and RNA-seq data**

244 *PP2C.D1* (AT5G02760), *HDS* (AT5G60600), *MAPK3* (AT3G45640), *MAPK6* (AT2G43790),  
245 *SARD1* (AT1G73805), *CBP60g* (AT5G26920), *ALD1* (AT2G13810), *FMO1* (AT1G19250),  
246 *ARF7* (AT5G20730), *ARF19* (AT1G19220), *ARF2* (AT5G62000), *ARF3* (AT2G33860), *ARF10*  
247 (AT2G28350), *ARF11* (AT2G46530), *ARF18* (AT3G61830).

248 All RNA-seq data were submitted to NCBI SRA database (PRJNA596287).

## 249 **Results**

### 250 **MEcPP-mediated transcriptional suppression of *PP2C.D1***

251 Comparative RNA-seq analyses of the high MEcPP-accumulating mutant, *ceh1*, versus wild-type  
252 plant revealed altered expression profile of the clade D phosphatases (Fig. **S1a-b**). Subsequent  
253 studies specifically identified *PP2C.D1*, also known as *APD7* (Arabidopsis PP2C clade D7) or  
254 *SSPP* (senescence-suppressed protein phosphatase) (Tovar-Mendez *et al.*, 2014; Xiao *et al.*,  
255 2015), as the phosphatase with the most notably reduced transcript levels compared to the other

256 clade members in the *ceh1* mutant. For simplicity throughout the paper, we will refer PP2C.D1  
257 as PP2C. Indeed, qRT-PCR analyses confirmed markedly lower *PP2C* expression levels in *ceh1*  
258 compared with the wild-type (Fig. **1a**).

259 Next, we analyzed the *PP2C* expression levels in salicylic acid deficient *eds16* and *ceh1/eds16*  
260 mutants to assess the potential regulatory input of the high SA present in *ceh1* mutant (Xiao *et al.*,  
261 2012) (Fig. **1a**). The results illustrate the SA-independent reduction of *PP2C* transcript levels in  
262 the high MEcPP-accumulating *ceh1* mutant backgrounds.

263 To investigate the MEcPP-mediated reduction of *PP2C* transcript levels, we exploited a  
264 dexamethasone (DEX)-inducible MEcPP accumulating line (*HDSi*), previously shown to  
265 accumulate similar MEcPP levels as that found in the *ceh1* mutant, at 72h post DEX-induction  
266 (Jiang *et al.*, 2018; Jiang *et al.*, 2019; Wang, JZ *et al.*, 2020). The analyses of *PP2C* expression  
267 levels in mock- and DEX-treated plants (72h post induction) display an inverse correlation  
268 between DEX-inducible accumulation of MEcPP and expression levels of *PP2C* (Fig. **1b**).

269 To provide a direct evidence for MEcPP-mediated suppression of *PP2C* expression, we  
270 examined the relative transcript levels of the gene in mock- and exogenously MEcPP-treated  
271 wild-type plants (Fig. **1c**). Indeed, the reduced transcript levels of *PP2C* an hour post MEcPP  
272 application confirm specificity of MEcPP in mediating this suppression.

273 To assess whether MEcPP-mediated suppression of *PP2C* is via transcriptional and/or  
274 posttranscriptional modifications, we employed plants expressing *PP2C* under the control of the  
275 constitutive promoter, 35S:*PP2C-GFP* (for simplicity herein designated *OE-PP2C*) and the  
276 introgressed line in the *ceh1* mutant background (*ceh1/OE-PP2C*) (Fig. **1d**). The similarly high  
277 *PP2C* transcripts in *OE-PP2C* and *ceh1/OE-PP2C* as compared to the notably reduced levels in  
278 the *ceh1* mutant background is a clear demonstration of the MEcPP-mediated transcriptional  
279 suppression of *PP2C*. Moreover, immunoblot analyses using *PP2C* specific antibody established  
280 the concordance between the protein and transcript levels, as evidenced by similarly high *PP2C*  
281 protein abundance in *OE-PP2C* and *ceh1/OE-PP2C* compared to undetectable protein levels in  
282 the *ceh1* mutant (Figs. **1d and S2**).

283 To examine a potential link between *PP2C* transcript levels and production of SA and/or MEcPP,  
284 we examined the abundance of these two metabolites in various genotypes (WT, *ceh1*, *ceh1/OE-*



285 *PP2C*, *OE-PP2C*, and the *pp2c* mutant) (Fig. 1e). The data explicitly confirm the *PP2C*-  
286 independent accumulation of MEcPP and SA.

287 Collectively, the finding establishes a SA-independent but MEcPP-dependent transcriptional  
288 suppression of *PP2C*, and excludes any *PP2C* regulatory input in accumulation of MEcPP and  
289 SA.

### 290 **MEcPP-mediated transcriptional regulation of *PP2C* is auxin-dependent**

291 To dissect the regulatory components of *PP2C* transcriptional machinery, we examined and  
292 identified four auxin response *cis*-elements (AuxRE) (Ulmasov *et al.*, 1995) in the *PP2C*  
293 promoter sequences (Fig. 2a). The presence of these auxin-dependent regulatory elements  
294 together with reduced abundance of auxin and its transporter PIN1 (Jiang *et al.*, 2018) via the  
295 MEcPP-mediated transcriptional and posttranslational regulatory input, led us to examine the  
296 *PP2C* transcript levels in mock- and auxin-treated *ceh1* and WT plants (Fig. 2b). The elevated  
297 *PP2C* transcript levels in WT and the *ceh1* mutant an hour post IAA-treatment compared with  
298 untreated plants is an indicative of IAA-dependent transcriptional regulation of *PP2C* expression,  
299 corroborating the previous finding (Nemhauser *et al.*, 2006; Ren *et al.*, 2018). It is of note that  
300 lower levels of *PP2C* expression in IAA-treated *ceh1* relative to the corresponding WT is likely  
301 in part due to the impairment of auxin distribution in the *ceh1* mutant caused by reduced  
302 abundance of auxin transporter, PIN1 (Jiang *et al.*, 2018). Alternatively and or additionally, the  
303 reduced expression of *PP2C* in IAA-treated *ceh1* relative to that of the WT plant could be  
304 attributed to decreased expression levels of auxin response factors (ARFs), a family of  
305 transcription factors responsible for the induction of AuxREs (Ulmasov *et al.*, 1999; Guilfoyle &  
306 Hagen, 2001). To test this hypothesis, we examined expression levels of several family members  
307 of ARFs (Figs. 2c and S3). Among the tested members, only *ARF7* and *19* displayed reduced  
308 transcript levels in *ceh1* backgrounds (*ceh1* and *ceh1/eds16*) compared to the corresponding  
309 controls (WT and *eds16*). This prompted us to examine the *PP2C* expression levels in mock- and  
310 auxin-treated single and double *arf7* and *19* mutants (Fig. 2d). The partial induction of *PP2C*  
311 expression in auxin-treated single mutants as opposed to no induction in the double mutant line  
312 compared with the WT plant, establishes the key function of two auxin response factors, ARF7  
313 and 19, in induction of *PP2C*.

314 The data collectively delineate the molecular strata of MEcPP-mediated suppression of *PP2C*

315 expression, commenced by reduced abundance of auxin, and the consequential decreased  
316 expression of *ARF7* and *19*, the *PP2C* transcriptional activators.

### 317 ***PP2C* suppresses the MEcPP-inducible RSRE-containing stress-response genes**

318 To examine the consequences of altered *PP2C* transcript levels in high MEcPP containing plants,  
319 we analyzed the global expression profiles of *ceh1/OE-PP2C* and *HDSi/OE-PP2C* versus those  
320 corresponding to *ceh1* and *HDSi* backgrounds (Supplemental data sets **1-3**). The analyses  
321 revealed a notable presence (47-to-68%) of robustly suppressed genes in *ceh1/OE-PP2C* and  
322 *HDSi/OE-PP2C* backgrounds, respectively, that contain a general stress response (GSR) *cis*-  
323 element, coined *Rapid Stress Response Element (RSRE)* (Walley *et al.*, 2007; Benn *et al.*, 2014;  
324 Benn *et al.*, 2016), in their promoters (Fig. **3a**, Table **S1**). To examine the validity of these  
325 analyses *in planta*, we employed *4xRSRE:Luciferase* line, used for functional readout of stress-  
326 induced rapid transcriptional responses (Walley *et al.*, 2007; Benn *et al.*, 2014; Bjornson *et al.*,  
327 2014), and introgressed it into the *ceh1* and *ceh1/OE-PP2C* backgrounds. Subsequent luciferase  
328 activity assays using homozygous introgressed lines showed markedly reduced luciferase activity  
329 in *ceh1/OE-PP2C/RSRE:LUC* line (herein designated as *ceh1/OE-PP2C*) compared with the  
330 previously established high and constitutive expression of the *RSRE* in *ceh1/RSRE:LUC* line  
331 (*ceh1*) (Benn *et al.*, 2016) (Fig. **3b**). Moreover, additional bioinformatics analyses revealed a 27%  
332 increase in the number of induced stress-response genes containing *RSRE* in *pp2c* mutant  
333 compared to *OE-PP2C* line (Fig. **3c**). Combined *in vivo* and *in silico* analyses support the  
334 involvement of *PP2C* in transcriptional regulation of *RSRE*-containing stress response genes.

335 Specifically, the Gene Ontology enrichment analyses of differentially expressed genes in *pp2c*  
336 mutant versus *OE-PP2C* lines revealed transcriptional profile that is partitioned into two distinct  
337 clusters of stress-response and growth-related genes (Fig. **S4** and Table **S2**). The inverse  
338 expression profiles of the two clusters support the notion of *PP2C* function in induction of  
339 growth-related genes, and suppression of stress-response genes (Fig. **S4**). Additional analyses  
340 established significant enrichment of induced plant-pathogen interaction pathway genes in *pp2c*  
341 mutant compared to the wild-type (Fig. **S5a**). This data support the recent report on reduction of  
342 *PP2C* transcript levels in response to *flg22* and *nlp20* treatment (Bjornson *et al.*, 2021) (Fig.  
343 **S5b**).

344 Collectively, our findings uncover the *PP2C*-mediated transcriptional reconfiguration of *RSRE*



345 containing genes, and further allude to the growth optimizing function of this phosphatase in  
346 concordance with its suggested role in promoting apical hook development in etiolated seedlings  
347 (Sentandreu *et al.*, 2011; Spartz *et al.*, 2014). Our experimental and bioinformatics data extend  
348 supports to the notion of PP2C function in both biotic and abiotic stress responses, and as a  
349 governing module balancing growth versus adaptive responses.

### 350 **PP2C suppresses transcription of Pip and NHP biosynthesis genes and their metabolites**

351 Extended bioinformatics analyses unraveled a significant reduction in the number of SAR- (43-  
352 to-52%) and Pip-induced (44-to-40%) genes in *ceh1/OE-PP2C* and *HDSi/OE-PP2C* versus their  
353 corresponding backgrounds, respectively (Fig. **S6a-b** and Table **S1**). This together with the  
354 known functions of Pip and NHP in triggering SAR (Navarova *et al.*, 2012; Hartmann, Michael  
355 *et al.*, 2018), prompted us to test the potential involvement of MEcPP, SA, and PP2C in  
356 modulating the expression of genes involved in Pip and NHP biosynthesis. Specifically, we  
357 analyzed the relative expression levels of *SARD1*, *CBP60g*, *ALDI* and *FMOI* in WT, *ceh1*,  
358 *eds16*, *ceh1/eds16*, *HDSi*, *HDSi/eds16*, *PP2C* overexpressing WT (*OE-PP2C*), *ceh1* (*ceh1/OE-*  
359 *PP2C*) and *pp2c* lines (Fig. **4a-b**). Similar expression profiles of the aforementioned genes in the  
360 *ceh1* mutant and the DEX-induced *HDSi* line relative to the corresponding controls (WT and  
361 mock-treated *HDSi*) illustrate their MEcPP-dependent induction in constitutive and in inducible  
362 lines (Fig. **4b**). However, while MEcPP induces expression of all the genes (*SARD1*, *CBP60g*,  
363 *ALDI* and *FMOI*), SA differentially alters their expression profile, as evidenced by the reduced  
364 *SARD1* but induced *FMOI* expression levels in SA-deficient *ceh1/eds16* line compared to *ceh1*.  
365 Moreover, the SA-mediated reduction of *CBP60g* in the inducible line is hindered by constitutive  
366 production of MEcPP, whereas the *ALDI* transcript levels remain SA-independent (Fig. **4b**).

367 Additional studies show that the overexpression of *PP2C* (*ceh1/OE-PP2C*) diminishes the  
368 MEcPP-mediated transcriptional induction of Pip and NHP biosynthetic genes, albeit at different  
369 degrees (Fig. **4b**). It is noteworthy that higher transcript levels of these genes in *ceh1* and  
370 *ceh1/OE-PP2C* relative to the WT, *OE-PP2C*, or *pp2c* may be due to the elevated MEcPP in the  
371 *ceh1* mutant. Lastly, similarly low expression levels of the genes in *pp2c* and WT lines could be  
372 attributed to the standard as opposed to stressed growth condition.

373 Next, we profiled Pip and NHP metabolite levels in aforementioned genotypes employed in the  
374 transcriptional profiling (Fig. **4c**). In concordance with the altered transcriptional profiles,

375 accumulation of Pip and NHP metabolites is positively correlated to the presence of  
376 constitutively high or inducible MEcPP levels in *ceh1* and *HDSi* lines (Fig. 4c). Whereas, the  
377 two metabolites are differentially accumulated in response to SA as evidenced by the reduced  
378 Pip content and enhanced NHP levels in *ceh1/eds16* relative to the *ceh1* mutant. In addition,  
379 decreased Pip and NHP levels in the *ceh1/OE-PP2C* relative to the *ceh1* mutant clearly support  
380 the PP2C-mediated reduction of both metabolites in spite of the high MEcPP levels.

381 Collectively, the finding establishes PP2C-mediated transcriptional suppression of Pip and NHP  
382 biosynthesis genes and by extension reduction of their corresponding metabolites, critical for  
383 eliciting systemic responses.

#### 384 **PP2C interacts with MAPK3 and 6**

385 To examine the subcellular site of PP2C action in high MEcPP containing *ceh1* mutant, we  
386 imaged the PP2C-GFP tagged *OE-PP2C* and *ceh1/OE-PP2C* lines, and confirmed plasma  
387 membrane, cytosolic and nuclear localization of the protein as previously reported for the WT  
388 background (Spartz *et al.*, 2014; Tovar-Mendez *et al.*, 2014; Ren *et al.*, 2018) (Fig. 5a).

389 To identify PP2C protein targets, we initially employed two independent methods. One method  
390 was based on immunoprecipitation-mass spectrometry (IP-MS) using a GFP specific antibody  
391 for IP of the PP2C interacting proteins in *ceh1/OE-PP2C* and *OE-PP2C* lines, and the control  
392 wild-type plant. As a second method, we employed a yeast-two-hybrid library-screening assay.  
393 The subsequent MS profiling of the samples derived from each of these two methods  
394 (Supplemental dataset 4), led to identification of several PP2C interacting proteins, most notably  
395 among them MAPK3 and 6.

396 Because of the indispensable function of these MAPKs in triggering Pip accumulation and by  
397 extension SAR induction (Wang *et al.*, 2018), we verified their interactions with PP2C by  
398 additional methods. One method was based on the agro-infiltration-based transient assays in  
399 *Nicotiana benthamiana*. For this approach we used fusion constructs of MAPK3/6 and PP2C in  
400 various configurations (MAPK3 fused to carboxyl-terminal fragment of LUC, and PP2C fused to  
401 amino-terminal fragment of LUC, MAPK6 fused to amino-terminal fragment and PP2C fused to  
402 carboxyl-terminal fragment of LUC) (Figs. 5b and S7a-b). The luciferase reconstitution-based  
403 activity is clearly evident in the leaves co-infiltrated with *PP2C* and *MAPK3* and *6* fusion

404 constructs, but is absent in the leaves co-infiltrated with the respective controls. In a second  
405 independent approach, we examined the *in vivo* interaction of PP2C with MAPK3 and MAPK6  
406 by targeted co-immunoprecipitation (CO-IP) using a GFP specific antibody for IP of PP2C-GFP  
407 in *ceh1/OE-PP2C*, *OE-PP2C* and *pPP2C:PP2C-GFP* lines, followed by immunoblot analyses  
408 using GFP as well as the MAPK3 and MAPK6 specific antibodies (Fig. 5c). The clear and  
409 specific presence of an MAPK3 and MAPK6 reacting bands in the IP fractions of *ceh1/OE-*  
410 *PP2C* and *OE-PP2C* lines, but not in the control agarose beads, verified the *in vivo* interaction of  
411 PP2C with MAPK3 and MAPK6 proteins (Fig. 5c).

412 Next, we explored the ramification of the interaction between MAPKs and PP2C protein by  
413 comparing the levels of phosphorylated MAPK3 and 6 in various genotypes (WT, *ceh1*,  
414 *ceh1/OE-PP2C*, *pp2c*, and *OE-PP2C*) using  $\alpha$ -pMAPK6 and  $\alpha$ -pMAPK3 antibodies deemed to  
415 specifically detect the respective phosphorylated proteins. The immunoblots clearly show  
416 similarly abundant phosphorylated kinases in WT and *pp2c*, however the levels are slightly but  
417 detectably reduced in *OE-PP2C* line grown under standard conditions (Fig. 5d). Furthermore,  
418 these differences are not attributed to changes in the total MAPK3/6 protein abundance in WT,  
419 *pp2c* and *OE-PP2C* line, as they display similar levels on the immunoblots probed with the  
420 respective antibodies (Fig. 5d). The most notable reduction in the abundance of phosphorylated  
421 MAPK3 and 6 is in *ceh1/OE-PP2C* compared to *ceh1* (Fig. 5d). It is of note that the MAPK3  
422 protein levels are similar between *ceh1* and *ceh1/OE-PP2C*, albeit more abundant than that of  
423 the other genotypes. This difference in abundance could contribute to higher levels of  
424 phosphorylated MAPK3 in the *ceh1* mutant relative to other genotypes, namely WT, *pp2c* and  
425 *OE-PP2C*. However, the higher level of phosphorylated MAPK3 in *ceh1* compared to *ceh1/OE-*  
426 *PP2C* is in spite of the similar abundance of total proteins in these genotypes. Additionally,  
427 altered levels of phosphorylated MAPK6 in various genotypes, most notably with heightened  
428 abundance in the *ceh1* mutant, is seemingly independent of slight variation of MAPK6 total  
429 protein levels amongst these genotypes (Fig. 5d).

430 The above results collectively identify MAPK3 and 6 kinases as PP2C interacting proteins.  
431 Moreover, the inverse correlation between PP2C protein abundance and the phosphorylated  
432 levels of MAPK3/6 support the notion of PP2C function as the phosphatase.

433 **Abiotic and biotic stresses enhance MEcPP and induce Pip and NHP levels**

434 We have previously established that the two most prevalent environmental insults, wounding and  
435 high-light induce MEcPP accumulation in plants (Xiao *et al.*, 2012). This data together with  
436 MEcPP-mediated increased levels of Pip and NHP metabolites prompted us to examine the  
437 impact of mechanical damage and high-light on accumulation of these two SAR triggering  
438 metabolites. Thus, we examined the sequential steps of the events starting from MEcPP  
439 accumulation to the production of Pip and NHP in high-light treated and wounded seedlings.

440 We initially examined high-light treated plants and established their increased MEcPP and  
441 decreased auxin content using transgenic R2D2 reporter lines expressing auxin-degradable (DII)  
442 fluorescent protein as a proxy for IAA levels (Liao *et al.*, 2015) (Figs **6a-b**). Reduced IAA  
443 content prompted us to examine the expression levels of *PP2C* and the auxin-responsive  
444 transcription factors, *ARF 7* and *19* in control and stressed seedlings (Fig. **6c**). Reduced  
445 expression levels of these genes in response to high-light treatment are reminiscent of our earlier  
446 observation in the *ceh1* mutant (Fig. **2c**). Reduced *ARF 7* and *19* transcript levels in stressed  
447 seedlings prompted us to examine the ramification of these reductions on the expression of genes  
448 within Pip and NHP biosynthetic pathway. As such, we compared the transcript levels of *CBP60*,  
449 *ALD1* and *FMO1* in the WT and *arf7/19* mutant lines (Fig. **S8**). The clear enhancement of the  
450 transcript levels of all genes in the *arf7/19* mutant line alludes to the suppressive function of  
451 ARF9 and 17 on the expression of Pip and NHP biosynthetic-pathway genes. The result provides  
452 a rationale for the stress-mediated suppression of ARF7 and 19, hence enabling increased  
453 production of Pip and NHP.

454 Next, we examined the relative abundance of phosphorylated MAPK3 and 6 in the high-light  
455 treated seedlings compared to the control (Fig. **6d**). The data establishes similar abundance of  
456 their total proteins but enhanced levels of phosphorylated MAPK3/6 under high light condition,  
457 (Fig. **6d**). Next we compared the abundance of Pip and NHP metabolites in the stressed versus  
458 the control seedlings and confirmed high-light-induced accumulation of the metabolites (Fig. **6e**).  
459 The finding supports the notion of Pip and NHP triggering SAA in response to high-light  
460 exposure.

461 Subsequently, we extended these studies to include unwounded and wounded (90 min post  
462 wounding) *pp2c* mutant and wild-type plants. The finding clearly establishes wound-induced  
463 MEcPP-accumulation independently of PP2C (Fig. **7a**). Furthermore, similarly to high-light-

464 treated plants, auxin levels as well as the expression levels of *ARF7*, *19* and *PP2C* are reduced in  
465 wounded relative to unwounded plants (Fig. **7b-c**). Moreover, wounding induces  
466 phosphorylation of MAPK3 and 6 in the WT and *pp2c* mutant (Figs. **7d and S9**). Accordingly,  
467 there is increased accumulation of Pip and NHP in both backgrounds albeit at higher levels in  
468 *pp2c* compared to the WT (Fig. **7e**).

469 Next we examined the multi-component signaling cascade potentiating the biosynthesis of SSR  
470 in plants challenged with two biotic stresses, aphids (*Macrosiphum euphorbiae*) and a viral  
471 pathogen [*Cucumber mosaic virus (CMV-m2b)*] (Fig. **8a-d**). The data clearly show increased  
472 MEcPP levels upon aphid infestation and CMV infection, followed by decreased expression of  
473 *ARF7/19* and *PP2C*, and the ensued heightened MAPK3 and 6 phosphorylation albeit without  
474 altered abundance of the total proteins, and finally induction of Pip and NHP metabolites.

475 Collectively, our findings establish a link between the two prevalent naturally occurring abiotic  
476 stresses and biotic insults to the induction of MEcPP levels followed by the reduction in auxin  
477 abundance and the consequential decline in *PP2C* expression, and ultimately phosphorylation of  
478 MAPK3/6 and accumulation of Pip and NHP metabolites. As such, the data supports functional  
479 expansion of Pip and NHP in eliciting SSR by abiotic or biotic triggers.

## 480 **Discussion**

481 Plants have evolved complex tiers of molecular and biochemical networks to detect, transmit and  
482 amplify adaptive signals for dynamic restoration of cellular homeostasis and function at the local  
483 and the distal site of insults. This broad spectrum response known as systemic stress response  
484 (SSR) appears to be conserved in plants across the plant kingdom, and as such the focus of  
485 intense studies (Shah & Zeier, 2013). However, the identity of signals that initiate this response  
486 has remained fragmentary. Here, we provide a complete module of the nature and the sequence  
487 of events that trigger SSR cascade (Fig. **9**). Specifically, we illustrate that accumulation of the  
488 stress-specific plastidial retrograde signaling metabolite, MEcPP, achieved either by genetic  
489 manipulation or via challenging plants with the two prevalent abiotic challenges (mechanical  
490 damage and high-light treatment) and two biotic insults (aphids and CMV), result in reduced  
491 auxin concentration and the consequential decreased expression of *ARF7* and *19*, the  
492 transcriptional activators of *PP2C*. Auxin-induction of *PP2C* corroborates the earlier finding  
493 (Nemhauser *et al.*, 2006) and supports the notion of *PP2C* function as a suppressor of stress-

494 response genes and an inducer of the growth-related genes. Although the notion is contradicted  
495 by the report of auxin-induced SMALL AUXIN UP-RNA binding to, and inhibiting SAUR19.  
496 This results in inactivation of PP2C and consequential phosphorylation and hence activity of H<sup>+</sup>-  
497 ATPase required for cell expansion in the apical hook of etiolated seedlings, where PP2C is  
498 abundantly present (Spartz *et al.*, 2014; Ren *et al.*, 2018). Indeed, induction of *PP2C* expression  
499 by auxin and suppression of its enzyme activity by the auxin-induced SAUR19 represent two  
500 conflicting auxin-based regulatory responses. These opposing responses are prime examples of  
501 multi-layered auxin-based fine-tuning of PP2C both at the expression and at the enzyme activity  
502 levels. This delicate balance shifts the function of PP2C enzyme to either a positive or a negative  
503 regulator of growth, depending upon the tissue, and tailored to nature of the environmental  
504 challenges.

505 Combined parallel and independent approaches of IP-MS, yeast-two-hybrid library screening,  
506 split-luciferase assay and CO-IP followed by immuno-blot analyses verified physical interactions  
507 between MAPK3/6 and PP2C protein. The biological ramification of this interaction is best  
508 captured by enhanced levels of phosphorylated MAPK3 and 6 in the constitutively (*ceh1* mutant)  
509 and stress-inducible MEcPP accumulating plants, and conversely by their reduced  
510 phosphorylated forms in *ceh1/OE-PP2C* lines, raising the likelihood of PP2C function as the  
511 responsible phosphatase. This notion is supported by the reduction of MAPK3/6 phosphorylation  
512 in *OE-PP2C* line compared to WT. It is of note that the lack of enhanced MAPK3/6  
513 phosphorylation in *pp2c* mutant line under standard condition, is likely due to the absence of a  
514 stress-activated kinase within the MAPK kinase kinases cascade, otherwise present in MEcPP  
515 accumulating *ceh1* mutant, and in biotically and abiotically challenged plants. This scenario is  
516 supported by H<sub>2</sub>O<sub>2</sub> activation of ANP1, an *Arabidopsis* MAPKKK that initiates a  
517 phosphorylation cascade including MAPK3/6 followed by induction of specific stress-responsive  
518 genes, and suppression of auxin-inducible genes (Kovtun *et al.*, 2000). Indeed, the functional  
519 input of MAPKs in mis-localizing polar auxin transport proteins (PINs) expands the regulatory  
520 roles of activated MAPKs in hampering auxin distribution and signal transduction (Jia *et al.*,  
521 2016; Dory *et al.*, 2018). This process may therefore constitute the underlying mechanism of  
522 reduced abundance of PIN1 in the MEcPP accumulating *ceh1* mutant, where MAPK  
523 phosphorylation of PIN1 result in mis-localization and degradation of this auxin transporter  
524 (Jiang *et al.*, 2018). If so, this places the reduction of *PP2C* transcript and the consequential



525 activation of MAPK3/6 at the interface between MEcPP and auxin signaling, and uncovers the  
526 sequence of events between the two regulatory capacities required for tailoring plant growth and  
527 developmental responses to environmental cues.

528 The converse correlation between PP2C abundance and the prevalence of SAR inducible genes  
529 in MEcPP-accumulating plants, confirmed by qRT-PCR analyses of targeted genes involved in  
530 Pip and NHP biosynthesis genes, is in agreement with the increase of the respective metabolite  
531 levels. Furthermore, analyses of constitutive and inducible MEcPP accumulating plant that are  
532 either deficient in, or contain high SA, show differential SA-mediated transcriptional responses.  
533 That is, except for the *SARDI* whose induction is partly dependent on SA, the expression levels  
534 of the other three genes are either SA-independent (*ALDI*) or suppressed by SA (*CBP60g* and  
535 *FMOI*). In contrast, MEcPP induces the expression of all these genes albeit at different degrees,  
536 placing *SARDI* as the least and *FMOI* as the most MEcPP-responsive genes. Moreover, analyses  
537 of Pip and NHP metabolite levels show that while SA induces Pip production, it suppresses NHP  
538 levels, whereas MEcPP-mediates induction of both metabolites although at different levels. This  
539 establishes MEcPP as the inducer of SSR, and further suggests that despite the critical role of SA  
540 as a mobile signal for SAR (Neuenschwander *et al.*, 1995; Park *et al.*, 2007), SA is not essential  
541 for production of Pip and NHP.

542 Additionally, increased levels of Pip and NHP in plants challenged with wounding and high-light  
543 expands the role of these SAR triggering metabolites to the establishment of a resistance state  
544 not only when confronted with biotic but also when challenged with abiotic insults as evidenced  
545 by the reported *FMOI* induction in response to H<sub>2</sub>O<sub>2</sub> accumulation (Chen & Umeda, 2015).

546 In summary, here we reveal the nature and the organization of a multicomponent retrograde  
547 signaling cascade that induces the biosynthesis of Pip and NHP in response to both biotic and  
548 abiotic insults. This occurs through alterations of positive and negative regulators that enable a  
549 timely modification of expression profiles and the consequential reconfiguration of the metabolic  
550 network for optimal implementation of this adaptive response as a general strategy to fend  
551 against a complex myriad of insults. We specifically identify plastids as the initiation site and the  
552 plastidial retrograde signaling metabolite, MEcPP, as the initiating signal potentiating the  
553 concerted arrays of signaling network responsible for production of Pip and NHP, the triggers of  
554 systemic stress responses in face of a myriad of environmental challenges.

## 555 **Acknowledgements**

556 We would like to thank Professor Elizabeth Sattely at Stanford University for providing us with  
557 the chemically synthesized NHP standard. We would like to thank our colleagues at UCR, Prof.  
558 Isgouhi Kaloshian and Dr. Jacob Macwilliams for aphid-infested plants, and Dr. Bailong Zhang  
559 for viral-infected plants. This work was supported by NSF CREATE-IGERT training program  
560 (NSF DGE-0653984) and NSF-GRFP 1148897 to M.L., by Dr. John W. Leibacher and Mrs.  
561 Kathy Cookson endowed chair funds to KD and by National Institutes of Health (NIH)  
562 GM067203 to W.M.G., and by NIH, R01GM107311-8 grant to KD.

### 563 **Authors' contributions**

564 L. Z., J.Z.W. and KD designed the study, L.Z., J.Z.W., X.H., H. K. and M. L. performed the  
565 experiments, W. M. G. provided antibody and K.D. wrote the manuscript.

### 566 **REFERENCES**

- 567 **Baxter A, Mittler R, Suzuki N. 2014.** ROS as key players in plant stress signalling. *Journal of*  
568 *Experimental Botany* **65**(5): 1229-1240.
- 569 **Benn G, Bjornson M, Ke H, De Souza A, Balmont EI, Shaw JT, Dehesh K. 2016.** Plastidial  
570 metabolite MEcPP induces a transcriptionally centered stress-response hub via the  
571 transcription factor CAMTA3. *Proceedings of the National Academy of Sciences of the*  
572 *United States of America* **113**(31): 8855-8860.
- 573 **Benn G, Wang CQ, Hicks DR, Stein J, Guthrie C, Dehesh K. 2014.** A key general stress  
574 response motif is regulated non-uniformly by CAMTA transcription factors. *The Plant*  
575 *journal : for cell and molecular biology* **80**(1): 82-92.
- 576 **Bernsdorff F, Döring A-C, Gruner K, Schuck S, Bräutigam A, Zeier J. 2016.** Pipecolic acid  
577 orchestrates plant systemic acquired resistance and defense priming via salicylic acid-  
578 dependent and-independent pathways. *The Plant Cell* **28**(1): 102-129.
- 579 **Bjornson M, Benn G, Song X, Comai L, Franz AK, Dandekar AM, Drakakaki G, Dehesh**  
580 **K. 2014.** Distinct roles for mitogen-activated protein kinase signaling and  
581 CALMODULIN-BINDING TRANSCRIPTIONAL ACTIVATOR3 in regulating the  
582 peak time and amplitude of the plant general stress response. *Plant Physiol* **166**(2): 988-  
583 996.
- 584 **Bjornson M, Pimprikar P, Nurnberger T, Zipfel C. 2021.** The transcriptional landscape of  
585 *Arabidopsis thaliana* pattern-triggered immunity. *Nat Plants*.
- 586 **Chanda B, Xia Y, Mandal MK, Yu K, Sekine KT, Gao QM, Selote D, Hu Y, Stromberg A,**  
587 **Navarre D, et al. 2011.** Glycerol-3-phosphate is a critical mobile inducer of systemic  
588 immunity in plants. *Nat Genet* **43**(5): 421-427.
- 589 **Chen P, Umeda M. 2015.** DNA double-strand breaks induce the expression of flavin-containing  
590 monooxygenase and reduce root meristem size in *Arabidopsis thaliana*. *Genes Cells* **20**(8):  
591 636-646.
- 592 **Chen YC, Holmes EC, Rajniak J, Kim JG, Tang S, Fischer CR, Mudgett MB, Sattely ES.**  
593 **2018.** N-hydroxy-pipecolic acid is a mobile metabolite that induces systemic disease



- 594 resistance in Arabidopsis. *Proceedings of the National Academy of Sciences of the United*  
595 *States of America* **115**(21): E4920-E4929.
- 596 **Cheong YH, Chang HS, Gupta R, Wang X, Zhu T, Luan S. 2002.** Transcriptional profiling  
597 reveals novel interactions between wounding, pathogen, abiotic stress, and hormonal  
598 responses in Arabidopsis. *Plant Physiol* **129**(2): 661-677.
- 599 **Couto D, Niebergall R, Liang X, Bucherl CA, Sklenar J, Macho AP, Ntoukakis V,**  
600 **Derbyshire P, Altenbach D, Maclean D, et al. 2016.** The Arabidopsis Protein  
601 Phosphatase PP2C38 Negatively Regulates the Central Immune Kinase BIK1. *PLoS*  
602 *Pathog* **12**(8): e1005811.
- 603 **Czarnocka W, Fichman Y, Bernacki M, Rózańska E, Sańko-Sawczenko I, Mittler R,**  
604 **Karpiński S. 2020.** FMO1 Is Involved in Excess Light Stress-Induced Signal  
605 Transduction and Cell Death Signaling. *Cells* **9**(10): 2163.
- 606 **Ding P, Rekhter D, Ding Y, Feussner K, Busta L, Haroth S, Xu S, Li X, Jetter R, Feussner I,**  
607 **et al. 2016.** Characterization of a Pipecolic Acid Biosynthesis Pathway Required for  
608 Systemic Acquired Resistance. *The Plant cell* **28**(10): 2603-2615.
- 609 **Dory M, Hatzimasoura E, Kallai BM, Nagy SK, Jager K, Darula Z, Nadai TV, Meszaros T,**  
610 **Lopez-Juez E, Barnabas B, et al. 2018.** Coevolving MAPK and PID phosphosites  
611 indicate an ancient environmental control of PIN auxin transporters in land plants. *FEBS*  
612 *letters* **592**(1): 89-102.
- 613 **Fuchs S, Grill E, Meskiene I, Schweighofer A. 2013.** Type 2C protein phosphatases in plants.  
614 *FEBS J* **280**(2): 681-693.
- 615 **Galletti R, Ferrari S, De Lorenzo G. 2011.** Arabidopsis MPK3 and MPK6 play different roles  
616 in basal and oligogalacturonide- or flagellin-induced resistance against *Botrytis cinerea*.  
617 *Plant physiology* **157**(2): 804-814.
- 618 **Gil P, Dewey E, Friml J, Zhao Y, Snowden KC, Putterill J, Palme K, Estelle M, Chory J.**  
619 **2001.** BIG: a calossin-like protein required for polar auxin transport in Arabidopsis.  
620 *Genes Dev* **15**(15): 1985-1997.
- 621 **Glasser C, Haberer G, Finkemeier I, Pfannschmidt T, Kleine T, Leister D, Dietz KJ,**  
622 **Hausler RE, Grimm B, Mayer KFX. 2014.** Meta-Analysis of Retrograde Signaling in  
623 Arabidopsis thaliana Reveals a Core Module of Genes Embedded in Complex Cellular  
624 Signaling Networks. *Mol Plant* **7**(7): 1167-1190.
- 625 **Guilfoyle TJ, Hagen G. 2001.** Auxin response factors. *Journal of Plant Growth Regulation*  
626 **20**(3): 281-291.
- 627 **Guindon S, Dufayard J-F, Lefort V, Anisimova M, Hordijk W, Gascuel O. 2010.** New  
628 algorithms and methods to estimate maximum-likelihood phylogenies: assessing the  
629 performance of PhyML 3.0. *Systematic biology* **59**(3): 307-321.
- 630 **Hartmann M, Kim D, Bernsdorff F, Ajami-Rashidi Z, Scholten N, Schreiber S, Zeier T,**  
631 **Schuck S, Reichel-Deland V, Zeier J. 2017.** Biochemical Principles and Functional  
632 Aspects of Pipecolic Acid Biosynthesis in Plant Immunity. *Plant physiology* **174**(1): 124-  
633 153.
- 634 **Hartmann M, Zeier T, Bernsdorff F, Reichel-Deland V, Kim D, Hohmann M, Scholten N,**  
635 **Schuck S, Bräutigam A, Hölzel T. 2018.** Flavin monooxygenase-generated N-  
636 hydroxypipicolinic acid is a critical element of plant systemic immunity. *Cell* **173**(2): 456-  
637 469. e416.
- 638 **Hartmann M, Zeier T, Bernsdorff F, Reichel-Deland V, Kim D, Hohmann M, Scholten N,**  
639 **Schuck S, Brautigam A, Hölzel T, et al. 2018.** Flavin Monooxygenase-Generated N-

- 640 Hydroxypipicolinic Acid Is a Critical Element of Plant Systemic Immunity. *Cell* **173**(2):  
641 456-469 e416.
- 642 **Hunt MD, Neuenschwander UH, Delaney TP, Weymann KB, Friedrich LB, Lawton KA,**  
643 **Steiner HY, Ryals JA. 1996.** Recent advances in systemic acquired resistance research--  
644 a review. *Gene* **179**(1): 89-95.
- 645 **Ichimura K, Shinozaki K, Tena G, Sheen J, Henry Y, Champion A, Kreis M, Zhang SQ,**  
646 **Hirt H, Wilson C, et al. 2002.** Mitogen-activated protein kinase cascades in plants: a  
647 new nomenclature. *Trends in plant science* **7**(7): 301-308.
- 648 **Jia W, Li B, Li S, Liang Y, Wu X, Ma M, Wang J, Gao J, Cai Y, Zhang Y, et al. 2016.**  
649 **Mitogen-Activated Protein Kinase Cascade MKK7-MPK6 Plays Important Roles in Plant**  
650 **Development and Regulates Shoot Branching by Phosphorylating PIN1 in Arabidopsis.**  
651 *PLoS Biol* **14**(9): e1002550.
- 652 **Jiang J, Rodriguez-Furlan C, Wang JZ, de Souza A, Ke H, Pasternak T, Lasok H,**  
653 **Ditengou FA, Palme K, Dehesh K. 2018.** Interplay of the two ancient metabolites auxin  
654 and MEcPP regulates adaptive growth. *Nature communications* **9**(1): 2262.
- 655 **Jiang J, Xiao Y, Chen H, Hu W, Zeng L, Ke H, Ditengou FA, Devisetty U, Palme K, Maloof**  
656 **J, et al. 2020.** Retrograde Induction of phyB Orchestrates Ethylene-Auxin Hierarchy to  
657 Regulate Growth. *Plant physiology* **183**(3): 1268-1280.
- 658 **Jiang J, Zeng L, Ke H, De La Cruz B, Dehesh K. 2019.** Orthogonal regulation of phytochrome  
659 B abundance by stress-specific plastidial retrograde signaling metabolite. *Nat Commun*  
660 **10**(1): 2904.
- 661 **Jung HW, Tschaplinski TJ, Wang L, Glazebrook J, Greenberg JT. 2009.** Priming in  
662 systemic plant immunity. *Science* **324**(5923): 89-91.
- 663 **Karpinski S, Reynolds H, Karpinska B, Wingsle G, Creissen G, Mullineaux P. 1999.**  
664 **Systemic signaling and acclimation in response to excess excitation energy in**  
665 **Arabidopsis. Science** **284**(5414): 654-657.
- 666 **Kazan K, Manners JM. 2009.** Linking development to defense: auxin in plant-pathogen  
667 interactions. *Trends Plant Sci* **14**(7): 373-382.
- 668 **Kiegerl S, Cardinale F, Siligan C, Gross A, Baudouin E, Liwosz A, Eklöf S, Till S, Bogre L,**  
669 **Hirt H, et al. 2000.** SIMKK, a mitogen-activated protein kinase (MAPK) kinase, is a  
670 specific activator of the salt stress-induced MAPK, SIMK. *The Plant cell* **12**(11): 2247-  
671 2258.
- 672 **Kim D, Perteza G, Trapnell C, Pimentel H, Kelley R, Salzberg SL. 2013.** TopHat2: accurate  
673 alignment of transcriptomes in the presence of insertions, deletions and gene fusions.  
674 *Genome biology* **14**(4): R36.
- 675 **Kolde R, Kolde MR. 2015.** Package ‘pheatmap’. *R Package* **1**(7): 790.
- 676 **Kovtun Y, Chiu WL, Tena G, Sheen J. 2000.** Functional analysis of oxidative stress-activated  
677 mitogen-activated protein kinase cascade in plants. *Proceedings of the National Academy*  
678 *of Sciences of the United States of America* **97**(6): 2940-2945.
- 679 **Kumar S, Stecher G, Li M, Knyaz C, Tamura K. 2018.** MEGA X: molecular evolutionary  
680 genetics analysis across computing platforms. *Molecular biology and evolution* **35**(6):  
681 1547-1549.
- 682 **Laskowski MJ, Dreher KA, Gehring MA, Abel S, Gensler AL, Sussex IM. 2002.** FQR1, a  
683 novel primary auxin-response gene, encodes a flavin mononucleotide-binding quinone  
684 reductase. *Plant Physiol* **128**(2): 578-590.
- 685 **Leon-Reyes A, Van der Does D, Koornneef A, Van Wees SC, Pieterse CM. 2010.**

- 686           Networking by small-molecule hormones in plant immunity. *Phytopathology* **100**(6):  
687           S160-S160.
- 688 **Liao CY, Smet W, Brunoud G, Yoshida S, Vernoux T, Weijers D. 2015.** Reporters for  
689           sensitive and quantitative measurement of auxin response. *Nat Methods* **12**(3): 207-210,  
690           202 p following 210.
- 691 **Love MI, Huber W, Anders S. 2014.** Moderated estimation of fold change and dispersion for  
692           RNA-seq data with DESeq2. *Genome biology* **15**(12): 550.
- 693 **Miles GP, Samuel MA, Zhang Y, Ellis BE. 2005.** RNA interference-based (RNAi) suppression  
694           of AtMPK6, an Arabidopsis mitogen-activated protein kinase, results in hypersensitivity  
695           to ozone and misregulation of AtMPK3. *Environ Pollut* **138**(2): 230-237.
- 696 **Moorhead GB, Trinkle-Mulcahy L, Ulke-Lemee A. 2007.** Emerging roles of nuclear protein  
697           phosphatases. *Nat Rev Mol Cell Biol* **8**(3): 234-244.
- 698 **Navarova H, Bernsdorff F, Doring AC, Zeier J. 2012.** Pipecolic Acid, an Endogenous  
699           Mediator of Defense Amplification and Priming, Is a Critical Regulator of Inducible  
700           Plant Immunity. *The Plant cell* **24**(12): 5123-5141.
- 701 **Navarro L, Dunoyer P, Jay F, Arnold B, Dharmasiri N, Estelle M, Voinnet O, Jones JD.**  
702           **2006.** A plant miRNA contributes to antibacterial resistance by repressing auxin signaling.  
703           *Science* **312**(5772): 436-439.
- 704 **Nemhauser JL, Hong F, Chory J. 2006.** Different plant hormones regulate similar processes  
705           through largely nonoverlapping transcriptional responses. *Cell* **126**(3): 467-475.
- 706 **Neuenschwander U, Vernooij B, Friedrich L, Uknes S, Kessmann H, Ryals J. 1995.** Is  
707           Hydrogen-Peroxide a 2nd-Messenger of Salicylic-Acid in Systemic Acquired-Resistance.  
708           *Plant Journal* **8**(2): 227-233.
- 709 **Olsen JV, Blagoev B, Gnadt F, Macek B, Kumar C, Mortensen P, Mann M. 2006.** Global, in  
710           vivo, and site-specific phosphorylation dynamics in signaling networks. *Cell* **127**(3): 635-  
711           648.
- 712 **Park SW, Kaimoyo E, Kumar D, Mosher S, Klessig DF. 2007.** Methyl salicylate is a critical  
713           mobile signal for plant systemic acquired resistance. *Science* **318**(5847): 113-116.
- 714 **Pieterse CMJ, Leon-Reyes A, Van der Ent S, Van Wees SCM. 2009.** Networking by small-  
715           molecule hormones in plant immunity. *Nat Chem Biol* **5**(5): 308-316.
- 716 **Pitzschke A, Hirt H. 2009.** Disentangling the complexity of mitogen-activated protein kinases  
717           and reactive oxygen species signaling. *Plant physiology* **149**(2): 606-615.
- 718 **Ren H, Park MY, Spartz AK, Wong JH, Gray WM. 2018.** A subset of plasma membrane-  
719           localized PP2C.D phosphatases negatively regulate SAUR-mediated cell expansion in  
720           Arabidopsis. *PLoS genetics* **14**(6): e1007455.
- 721 **Ryals JA, Neuenschwander UH, Willits MG, Molina A, Steiner HY, Hunt MD. 1996.**  
722           Systemic Acquired Resistance. *The Plant cell* **8**(10): 1809-1819.
- 723 **Schweighofer A, Hirt H, Meskiene I. 2004.** Plant PP2C phosphatases: emerging functions in  
724           stress signaling. *Trends in plant science* **9**(5): 236-243.
- 725 **Schweighofer A, Kazanaviciute V, Scheikl E, Teige M, Doczi R, Hirt H, Schwanninger M,**  
726           **Kant M, Schuurink R, Mauch F. 2007.** The PP2C-type phosphatase AP2C1, which  
727           negatively regulates MPK4 and MPK6, modulates innate immunity, jasmonic acid, and  
728           ethylene levels in Arabidopsis. *The Plant cell* **19**(7): 2213-2224.
- 729 **Sentandreu M, Martin G, Gonzalez-Schain N, Leivar P, Soy J, Tepperman JM, Quail PH,**  
730           **Monte E. 2011.** Functional profiling identifies genes involved in organ-specific branches  
731           of the PIF3 regulatory network in Arabidopsis. *The Plant cell* **23**(11): 3974-3991.

- 732 **Seo S, Katou S, Seto H, Gomi K, Ohashi Y. 2007.** The mitogen-activated protein kinases  
733 WIPK and SIPK regulate the levels of jasmonic and salicylic acids in wounded tobacco  
734 plants. *Plant Journal* **49**(5): 899-909.
- 735 **Shah J, Zeier J. 2013.** Long-distance communication and signal amplification in systemic  
736 acquired resistance. *Front Plant Sci* **4**.
- 737 **Spaepen S, Vanderleyden J, Remans R. 2007.** Indole-3-acetic acid in microbial and  
738 microorganism-plant signaling. *FEMS Microbiol Rev* **31**(4): 425-448.
- 739 **Spartz AK, Ren H, Park MY, Grandt KN, Lee SH, Murphy AS, Sussman MR, Overvoorde  
740 PJ, Gray WM. 2014.** SAUR inhibition of PP2C-D phosphatases activates plasma  
741 membrane H<sup>+</sup>-ATPases to promote cell expansion in Arabidopsis. *The Plant Cell* **26**(5):  
742 2129-2142.
- 743 **Spoel SH, Dong XN. 2012.** How do plants achieve immunity? Defence without specialized  
744 immune cells. *Nature Reviews Immunology* **12**(2): 89-100.
- 745 **Taj G, Agarwal P, Grant M, Kumar A. 2010.** MAPK machinery in plants: recognition and  
746 response to different stresses through multiple signal transduction pathways. *Plant Signal  
747 Behav* **5**(11): 1370-1378.
- 748 **Team RC 2013.** R: A language and environment for statistical computing: Vienna, Austria.
- 749 **Teixeira MA, Sela N, Atamian HS, Bao E, Chaudhary R, MacWilliams J, He J, Mantelin S,  
750 Girke T, Kaloshian I. 2018.** Sequence analysis of the potato aphid *Macrosiphum  
751 euphorbiae* transcriptome identified two new viruses. *PloS one* **13**(3): e0193239.
- 752 **Tognetti VB, Muhlenbock P, Van Breusegem F. 2012.** Stress homeostasis - the redox and  
753 auxin perspective. *Plant Cell Environ* **35**(2): 321-333.
- 754 **Tovar-Mendez A, Miernyk JA, Hoyos E, Randall DD. 2014.** A functional genomic analysis of  
755 Arabidopsis thaliana PP2C clade D. *Protoplasma* **251**(1): 265-271.
- 756 **Townsley BT, Covington MF, Ichihashi Y, Zumstein K, Sinha NR. 2015.** BrAD-seq: Breath  
757 Adapter Directional sequencing: a streamlined, ultra-simple and fast library preparation  
758 protocol for strand specific mRNA library construction. *Frontiers in plant science* **6**: 366.
- 759 **Ulmasov T, Hagen G, Guilfoyle TJ. 1999.** Activation and repression of transcription by auxin-  
760 response factors. *Proceedings of the National Academy of Sciences of the United States of  
761 America* **96**(10): 5844-5849.
- 762 **Ulmasov T, Liu ZB, Hagen G, Guilfoyle TJ. 1995.** Composite structure of auxin response  
763 elements. *The Plant cell* **7**(10): 1611-1623.
- 764 **Umbrasaite J, Schweighofer A, Kazanaviciute V, Magyar Z, Ayatollahi Z, Unterwurzacher  
765 V, Choopayak C, Boniecka J, Murray JA, Bogre L, et al. 2010.** MAPK phosphatase  
766 AP2C3 induces ectopic proliferation of epidermal cells leading to stomata development  
767 in Arabidopsis. *PloS one* **5**(12): e15357.
- 768 **Verma V, Ravindran P, Kumar PP. 2016.** Plant hormone-mediated regulation of stress  
769 responses. *BMC Plant Biol* **16**.
- 770 **Walley JW, Coughlan S, Hudson ME, Covington MF, Kaspi R, Banu G, Harmer SL,  
771 Dehesh K. 2007.** Mechanical stress induces biotic and abiotic stress responses via a  
772 novel cis-element. *PLoS genetics* **3**(10): 1800-1812.
- 773 **Wang C-Q, Guthrie C, Sarmast MK, Dehesh K. 2014.** BBX19 interacts with CONSTANS to  
774 repress FLOWERING LOCUS T transcription, defining a flowering time checkpoint in  
775 Arabidopsis. *The Plant Cell* **26**(9): 3589-3602.
- 776 **Wang D, Pajerowska-Mukhtar K, Culler AH, Dong X. 2007.** Salicylic acid inhibits pathogen  
777 growth in plants through repression of the auxin signaling pathway. *Current biology : CB*



- 778 17(20): 1784-1790.
- 779 **Wang J, Sun N, Zhang F, Yu R, Chen H, Deng XW, Wei N. 2020.** SAUR17 and SAUR50  
780 Differentially Regulate PP2C-D1 during Apical Hook Development and Cotyledon  
781 Opening in Arabidopsis. *The Plant cell* **32**(12): 3792-3811.
- 782 **Wang JZ, Lei Y, Xiao Y, He X, Liang J, Jiang J, Dong S, Ke H, Leon P, Zerbe P, et al. 2020.**  
783 Uncovering the functional residues of Arabidopsis isoprenoid biosynthesis enzyme HDS.  
784 *Proceedings of the National Academy of Sciences of the United States of America* **117**(1):  
785 355-361.
- 786 **Wang Y, Schuck S, Wu J, Yang P, Doring AC, Zeier J, Tsuda K. 2018.** A MPK3/6-  
787 WRKY33-ALD1-Pipelicolic Acid Regulatory Loop Contributes to Systemic Acquired  
788 Resistance. *The Plant cell* **30**(10): 2480-2494.
- 789 **Xiao D, Cui Y, Xu F, Xu X, Gao G, Wang Y, Guo Z, Wang D, Wang NN. 2015.**  
790 SENESCENCE-SUPPRESSED PROTEIN PHOSPHATASE Directly Interacts with the  
791 Cytoplasmic Domain of SENESCENCE-ASSOCIATED RECEPTOR-LIKE KINASE  
792 and Negatively Regulates Leaf Senescence in Arabidopsis. *Plant physiology* **169**(2):  
793 1275-1291.
- 794 **Xiao Y, Savchenko T, Baidoo EE, Chehab WE, Hayden DM, Tolstikov V, Corwin JA,  
795 Kliebenstein DJ, Keasling JD, Dehesh K. 2012.** Retrograde signaling by the plastidial  
796 metabolite MEcPP regulates expression of nuclear stress-response genes. *Cell* **149**(7):  
797 1525-1535.
- 798 **Xue T, Wang D, Zhang S, Ehlting J, Ni F, Jakab S, Zheng C, Zhong Y. 2008.** Genome-wide  
799 and expression analysis of protein phosphatase 2C in rice and Arabidopsis. *BMC*  
800 *genomics* **9**(1): 550.
- 801 **Yu X, Pasternak T, Eiblmeier M, Ditengou F, Kochersperger P, Sun J, Wang H,  
802 Rennenberg H, Teale W, Paponov I, et al. 2013.** Plastid-localized glutathione  
803 reductase2-regulated glutathione redox status is essential for Arabidopsis root apical  
804 meristem maintenance. *Plant Cell* **25**(11): 4451-4468.
- 805 **Zandalinas SI, Fichman Y, Devireddy AR, Sengupta S, Azad RK, Mittler R. 2020.** Systemic  
806 signaling during abiotic stress combination in plants. *Proceedings of the National*  
807 *Academy of Sciences of the United States of America* **117**(24): 13810-13820.
- 808 **Zeier J. 2013.** New insights into the regulation of plant immunity by amino acid metabolic  
809 pathways. *Plant Cell and Environment* **36**(12): 2085-2103.
- 810 **Zeier J, Pink B, Mueller MJ, Berger S. 2004.** Light conditions influence specific defence  
811 responses in incompatible plant-pathogen interactions: uncoupling systemic resistance  
812 from salicylic acid and PR-1 accumulation. *Planta* **219**(4): 673-683.
- 813 **Zhang S, Klessig DF. 2001.** MAPK cascades in plant defense signaling. *Trends in plant science*  
814 **6**(11): 520-527.
- 815 **Zhong R, Thompson J, Ottesen E, Lamppa GK. 2010.** A forward genetic screen to explore  
816 chloroplast protein import in vivo identifies Moco sulfurase, pivotal for ABA and IAA  
817 biosynthesis and purine turnover. *Plant J* **63**(1): 44-59.

818

819

820

821 **Figure legends**

822 **Figure 1. MEcPP-mediates transcriptional suppression of *PP2C***

823 (a) Suppression of *PP2C* expression is MEcPP-dependent and SA-independent. Total RNAs  
824 isolated from two-week-old seedlings of wild-type (WT), *ceh1/eds16*, *eds16* were subjected to  
825 qRT-PCR analyses. (b) Accumulation of MEcPP is inversely correlated to *PP2C* transcript  
826 levels. Relative expression of *PP2C* and MEcPP levels in DEX-inducible *HDSi* line 72 hours  
827 post mock- (-) and DEX-treatment (+). Analyses were performed on two-week-old seedlings. (c)  
828 Relative expression levels of *PP2C* in WT plants, 60 min post mock- (-) and MEcPP (100  $\mu$ M)-  
829 treatment (+) confirms MEcPP-dependent transcriptional suppression of *PP2C*. (d) Reduced  
830 expression level of *PP2C* in *ceh1* is recovered in *PP2C* overexpressing *ceh1* (*ceh1/OE-PP2C*)  
831 and wild-type (*OE-PP2C*) lines. Immunoblot analyses using PP2C antibody display undetectable  
832 protein in *ceh1*, but detectably similar levels in PP2C overexpressing lines. The lower non-  
833 specific reacting band and Ponceau S staining show equal loading. (e) Analyses of MEcPP and  
834 SA levels in WT, *ceh1*, *ceh1/OE-PP2C*, *OE-PP2C* and *PP2C* mutant line (*pp2c*) show PP2C-  
835 independent accumulation of the metabolites. The *PP2C* mRNA levels was normalized to the  
836 levels of *At4g26410* (M3E9). All Data are mean  $\pm$  SD of three biological and three technical  
837 replicates. Two-tailed Student's *t* tests or ANOVA tests confirm MEcPP-mediated suppression  
838 of *PP2C*. Asterisks denotes significance. Lower case letters on top of histograms represent  
839 statistically significant differences ( $P \leq 0.05$ ).

840 **Figure 2. Auxin induces *PP2C* expression**

841 (a) The schematic presentation of the *PP2C* promoter display the positions of auxin response  
842 elements (AuxRE). (b) Expression levels of *PP2C* an hour post mock- (-) and auxin (10  $\mu$ M) -  
843 treatment (+) of *ceh1* and WT seedlings display enhanced expression in auxin-treated lines. (c)  
844 Reduced expression levels of auxin response factors (*ARF7* and *19*) in *ceh1* and *ceh1/eds16*  
845 compared to the levels in WT and *eds16* lines. (d) *PP2C* expression levels an hour post mock- (-)  
846 and auxin (10  $\mu$ M)-treatment (+) of WT, single (*arf7*, and *arf19*) and double (*arf7/arf19*) mutant  
847 lines display indispensable function of ARF7 and 19 in auxin-induction of *PP2C* expression.  
848 Statistical analyses were performed by two-tailed Student's *t* tests or ANOVA tests.

849 **Figure 3. *PP2C* suppresses the MEcPP-inducible SAR and RSRE-containing genes**

850 (a) Venn diagrams illustrate suppression of a significant number of MEcPP-inducible RSRE-

851 motif containing genes in *PP2C* overexpressing (*ceh1/OE-PP2C* and *HDSi/OE-PP2C*) lines. **(b)**  
852 Representative images of *PP2C* overexpressing lines in the *ceh1* background (*ceh1/OE-PP2C*)  
853 show the notable reduction of RSRE:LUC activity compared to the *ceh1* mutant. The bar  
854 underneath displays the intensity of LUC activity and the histogram show quantification of LUC  
855 activity. Data are presented as means  $\pm$  SEM. Asterisk notes statistically significant differences  
856 ( $P \leq 0.05$ ) by using two-tailed Student's *t* test. **(c)** Venn diagrams illustrate enrichment of RSRE-  
857 motif containing genes whose expressions are significantly induced in the *pp2c* mutant but not in  
858 *OE-PP2C* plants under standard conditions.

859 **Figure 4. PP2C suppresses transcription of Pip and NHP biosynthesis genes and**  
860 **corresponding metabolites**

861 **(a)** Schematic presentation of pipecolic acid (Pip) and N-hydroxy-pipecolic acid (NHP)  
862 biosynthesis pathway. **(b)** Relative expression levels of *SARD1*, *CBP60g*, *ALD1* and *FMO1* in  
863 WT, *ceh1*, *eds16*, *ceh1/eds16*, and in mock (-) and post 72 h DEX-treated *HDSi* and *HDSi/eds16*  
864 lines, and in *PP2C* overexpression in the wild-type (*OE-PP2C*) and the *ceh1* mutant (*ceh1/OE-*  
865 *PP2C*) backgrounds as well as in *pp2c* mutant, show reversion of SA- and MEcPP-dependent  
866 induction of these genes in *PP2C* overexpressing lines. **(c)** Measurements of Pip and NHP  
867 metabolites in aforementioned genotypes confirm their MEcPP- and SA-dependent alterations,  
868 and their reduced abundance in *PP2C* overexpression lines. All Data are mean  $\pm$  SD of three  
869 biological and three technical replicates. Lower case letters on top of histograms represent  
870 statistically significant differences ( $P \leq 0.05$ ) by using ANOVA test.

871 **Figure 5. MAPK3/6 phosphorylation levels and their physical interaction with PP2C**

872 **(a)** Confocal images of plasma membrane, cytosolic and nuclear localization of PP2C in the  
873 wild-type (*OE-PP2C*) and *ceh1* (*ceh1/OE-PP2C*) backgrounds overexpressing 35S::PP2C-GFP  
874 construct. **(b)** Representatives of split luciferase complementation assays in *Nicotiana*  
875 *benthamiana* displayed by dark-field images of leaves expressing cLuc-MAPK3 (C-terminal Luc  
876 fused with MAPK3) and nLuc-PP2C (N-terminal Luc fragment fused with PP2C) (upper panel)  
877 and MAPK6-nLuc (MAPK6 fused with N-terminal fragment of Luc) and PP2C-cLuc (PP2C  
878 fused with C-terminal fragment Luc) (lower panel). **(c)** The *in vivo* interaction of PP2C with  
879 MAPK3 and MAPK6 determined by co-immunoprecipitation assay. Protein samples obtained  
880 from *ceh1/OE-PP2C*, *OE-PP2C*, and *pPP2C:PP2C-GFP* seedlings grown under standard

881 conditions were immunoprecipitated using GFP (+) and empty (-) magnetic beads. Immunoblots  
882 were analyzed using with  $\alpha$ -MAPK3 or  $\alpha$ -MAPK6. Each blot shows protein inputs before (input,  
883 right panels) and after (IP, left panels) immunoprecipitation. **(d)** Immunoblots show that *PP2C*  
884 overexpression in the *ceh1* mutant reverses the MEcPP-mediated high phosphorylation of  
885 MAPK3 and MAPK6 ( $\alpha$ -pMAPK6 and  $\alpha$ -pMAPK3, top panels), without notable impact on the  
886 protein abundance of MAPK6 (middle panels) or MAPK3 (bottom panels). Ponceau S staining  
887 shows protein loading.

### 888 **Figure 6. High light induces MEcPP accumulation and enhances Pip and NHP abundance**

889 **(a)** Induction of MEcPP levels and **(b)** reduction of IAA abundance 90 min post high light (800  
890  $\mu\text{mol m}^{-2}\text{s}^{-1}$ , 90 min) treatment as measured by fluorescence of mDII-ntdTomato/DII-n3xVenus  
891 and the corresponding bright-field images of control and high light-treated auxin reporter R2D2  
892 seedlings. **(c)** Relative expression levels of *ARF 7/19* and *PP2C* in high-light-treated seedlings.  
893 **(d)** Immunoblot analyses of total and phosphorylated MAPK3/6 in high-light-treated seedlings.  
894 Ponceau S show equal protein loading. **(e)** Enhanced levels of Pip and NHP metabolites in high  
895 light-treated seedlings. Two-tailed Student's *t* tests and ANOVA tests are used for the statistical  
896 analyses and the asterisk and different letters denote significance ( $P \leq 0.05$ ).

### 897 **Figure 7. Wounding induces MEcPP accumulation and enhances Pip and NHP abundance**

898 **(a)** Induction of MEcPP levels and **(b)** reduction of IAA abundance in 90 min post wounded WT  
899 and *pp2c* mutant seedlings compared to control unwounded plants. **(c)** Relative expression  
900 levels of *ARF 7/19* and *PP2C* in unwounded and wounded WT plants. **(d)** Immunoblot analyses  
901 of total and phosphorylated MAPK3/6 in unwounded and wounded WT and *pp2c* mutant  
902 seedlings. Ponceau S show equal protein loading. **(e)** Metabolic analyses of Pip and NHP in  
903 wounded and WT and *pp2c* mutant seedlings. Two-tailed Student's *t*-tests and ANOVA tests are  
904 used for the statistical analyses and the asterisk and different letters denote statistical significance  
905 ( $P \leq 0.05$ ).

### 906 **Figure 8. Aphid infestation and viral infection induce MEcPP accumulation and enhance** 907 **Pip and NHP abundance**

908 **(a)** Induction of MEcPP post 2 weeks of cucumber mosaic virus (CMV-M2b) infection, and 24h  
909 aphid infestation in WT seedlings, and **(b)** suppression of *ARF 7/19* and *PP2C* expression in



910 biotically challenged plants. (c) Immunoblot analyses of total and phosphorylated MAPK3/6 in  
911 mock (-) and virus/aphids (+) treated seedlings. Ponceau S show equal protein loading. (d)  
912 Metabolic analyses of Pip and NHP in mock (-) and virus/aphids (+) treated seedlings. The  
913 asterisk denotes statistical significance ( $P \leq 0.05$ ) by using two-tailed Student's *t*-tests.

#### 914 **Figure 9. Biotic and abiotic insults trigger the retrograde signaling cascade initiating SSR**

915 Schematic model depicting biotically and abiotically-induced MEcPP-accumulation mediates  
916 reduction of auxin abundance that lessens expression levels of the ARF7/19, the transcriptional  
917 activators of *PP2C*. This enables phosphorylation of MAPK3/6 required for induction of Pip and  
918 NPH biosynthesis genes and production of their respective metabolites key to activation of  
919 general SSR.

#### 920 **Supporting Information**

#### 921 **Figure S1. Reduced expression of *PP2C* in the *ceh1* mutant**

922 (a) Phylogeny of *PP2C* family members in clade D. (b) RNA-seq-based analyses of relative  
923 expression levels of *PP2C.D* family members show decreased levels of *PP2C.D1* and *PP2C.D7*,  
924 and increased levels of *PP2C.D8* and *PP2C.D9* expression in the *ceh1* mutant relative to the  
925 wild-type plant.

#### 926 **Figure S2. *PP2C* immunoblot.**

927 (a) Detection of *PP2C* protein using *PP2C* antibody on an immunoblot of protein extracts from  
928 various genotypes. (b) Ponceau S stain shows the equal loading.

#### 929 **Figure S3 Relative expression levels of selected *ARF* family members**

930 Total RNAs isolated from two-week-old wild-type (WT), *ceh1/eds16*, *eds16* seedlings were  
931 subjected to q-PCR analyses. Relative expression levels of representative *ARFs* (*ARF2*, *ARF3*,  
932 *ARF10*, *ARF11* and *ARF18*) were normalized to the levels of *At4g26410* (M3E9). All Data are  
933 mean  $\pm$  SD of three biological and three technical replicates. Two-tailed Student's *t* test confirms  
934 MEcPP-independent expression of these *ARF* members.

#### 935 **Figure S4. GO term analyses implicate *PP2C* as a growth-promoter and a stress-suppressor**

936

937 Comparative GO term analyses of induced genes in the *pp2c* mutant and *PP2C* overexpressing  
938 line (*OE-PP2C*) implicate *PP2C* as a stress suppressor and a growth promoter. The red bar shows  
939 the  $-\text{Log}_{10}$  P-values of altered transcript levels.

940 **Figure S5. *PP2C* is likely involved in biotic stress responses.**

941 (a) KEGG pathway enrichment analyses of induced genes in the *pp2c* mutant compared to Col,  
942 implicating *PP2C* as a biotic stress suppressor. The red bar shows the  $-\text{Log}_{10}$  P-values of  
943 enriched pathways. (b) The expression level of *PP2C* is significantly suppressed by pathogen-  
944 associated molecular patterns (PAMPs) treatment (flg22 and nlp20) of Col post 90 and 180 min.  
945 Data retrieved from the recently published report (Bjornson *et al.*, 2021). The star on each  
946 histogram indicates significant changes of the expression level compared to the representative  
947 mock treatment.

948 **Figure S6. *PP2C* overexpression modifies transcriptional profile**

949 Venn diagrams illustrate significantly reduced number of SAR-induced (a) and Pip-induced  
950 genes (b) in *PP2C* overexpressing *ceh1* and inducible *HDSi* lines.

951 **Figure S7. Split luciferase complementation assays in *Nicotiana benthamiana***

952 Representatives of split luciferase complementation assays in *Nicotiana benthamiana* displayed  
953 by bright-field images of leaves expressing cLuc-MAPK3 (C-terminal Luc fused with MAPK3)  
954 and nLuc-*PP2C* (N-terminal Luc fragment fused with *PP2C*) (upper panel) and MAPK6-nLuc  
955 (MAPK6 fused with N-terminal fragment of Luc) and *PP2C*-cLuc (*PP2C* fused with C-terminal  
956 fragment Luc) (lower panel). Negative controls for each constructs include cLuc-MAPK3 &  
957 nLuc; cLuc & nLuc-*PP2C*; MAPK6-nLuc & cLuc and nLuc & *PP2C*-cLuc.

958 **Figure S8. Induction of *CBP60g*, *ALD1* and *FMO1* transcript levels in *arf7/19* mutant.**

959 Total RNAs isolated from two-week-old wild-type and *arf7/19* double mutant seedlings were  
960 subjected to q-PCR analyses. Relative expression levels of *CBP60g*, *ALD1* and *FMO1* were  
961 normalized to the levels of *At4g26410* (M3E9). All Data are mean  $\pm$  SD of three biological and  
962 three technical replicates. The star represents the significantly statistic differences by two-tailed  
963 Student's *t* test.

964 **Figure S9. Normalized relative intensity of protein levels.**

965 Phosphorylated MAPK6 (pMAPK6) and MAPK3 (pMAPK3), and un-phosphorylated MAPK6  
966 and MAPK3 proteins are normalized to the levels of Ponceau stain of Rubisco.

967 **Table S1. Percentage of MEcPP-induced and PP2C-suppressed SAR- and Pip-inducible**  
968 **genes, and the RSRE containing genes**

969 **Table S2. GO term analyses of the up-regulated genes in *pp2c* mutant and *OE-PP2C*.** The  
970 presented number is -Log<sub>10</sub> (P-value) for each of the GO term.

971 **Table S3. List of used primers**

972 **Supplemental data sets 1-3. List of differentially expressed genes**

973 **Supplemental data set 4. List of identified proteins in IP-MS**

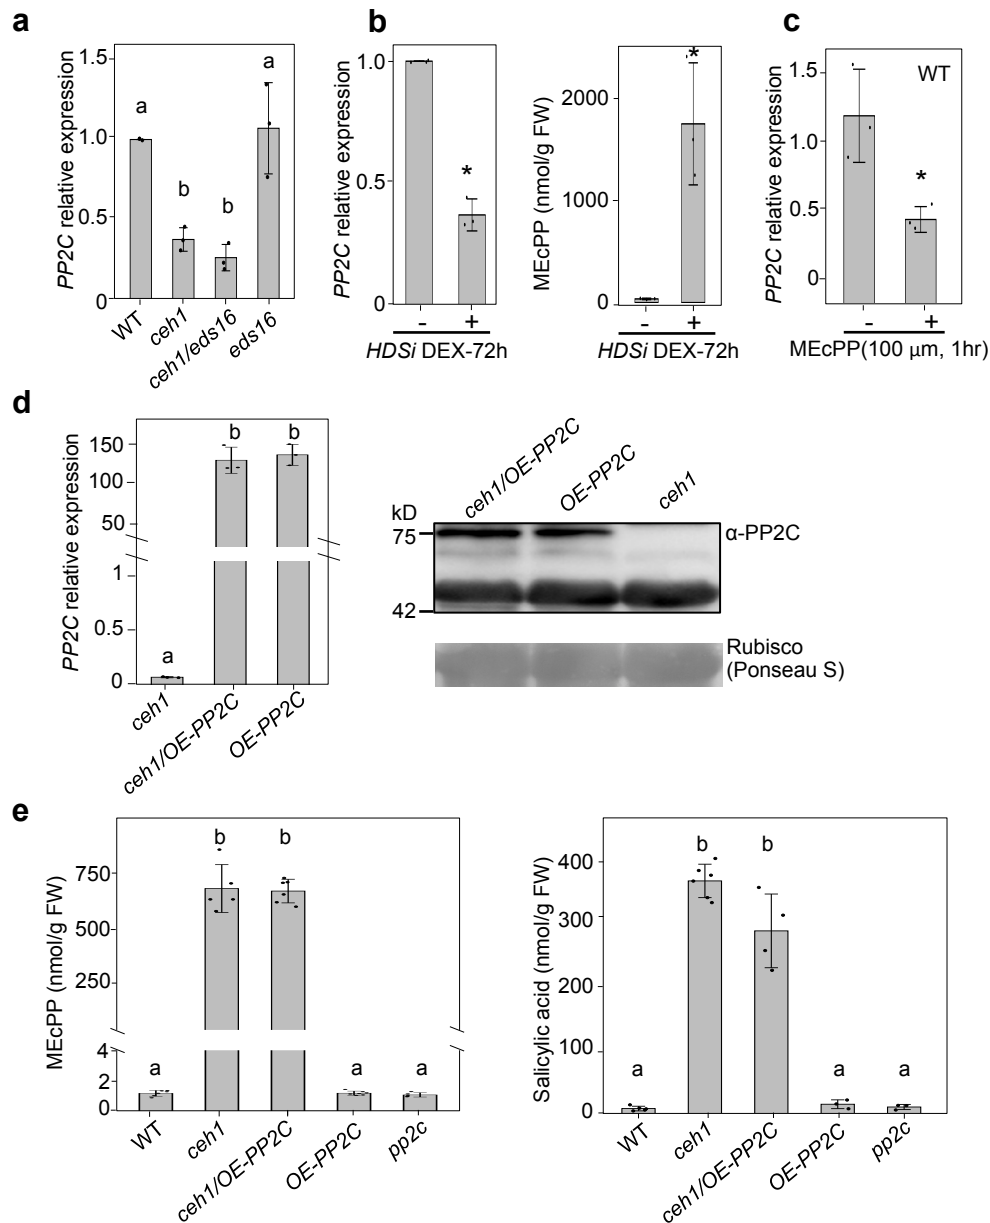

**Figure 1. MEcPP-mediate transcriptional suppression of PP2C**

(a) Suppression of *PP2C* expression is MEcPP-dependent and SA-independent. Total RNAs isolated from two-week-old seedlings of wild type (WT), *ceh1/eds16*, *eds16* were subjected to qRT-PCR analyses. (b) Accumulation of MEcPP is inversely correlated to *PP2C* transcript levels. Relative expression of *PP2C* and MEcPP levels in DEX-inducible *HDSi* line 72 hours post mock- (-) and DEX-treatment (+). Analyses were performed on two-week-old seedlings. (c) Relative expression levels of *PP2C* in WT plants, 60 min post mock- (-) and MEcPP (100 mM)-treatment (+) confirms MEcPP-dependent transcriptional suppression of *PP2C*. (d) Reduced expression levels of *PP2C* in *ceh1* is recovered in *PP2C* overexpressing *ceh1* (*ceh1/OE-PP2C*) and wild type (*OE-PP2C*) lines. Immunoblot analyses using *PP2C* antibody display undetectable protein in *ceh1*, but detectably similar levels in *PP2C* overexpressing lines. The lower non-specific reacting band and Ponceau S staining show equal loading. (e) Analyses of MEcPP and SA levels in WT, *ceh1*, *ceh1/OE-PP2C*, *OE-PP2C* and *PP2C* mutant line (*pp2c*) show *PP2C*-independent accumulation of the metabolites. The *PP2C* mRNA levels was normalized to the levels of *At4g26410* (M3E9). All Data are mean  $\pm$  SD of three biological and three technical replicates. Two-tailed Student's *t* tests or ANOVA tests confirm MEcPP-mediated suppression of *PP2C*. Asterisks denote significance. Lower case letters on top of histograms represent statistically significant differences ( $P \leq 0.05$ ).

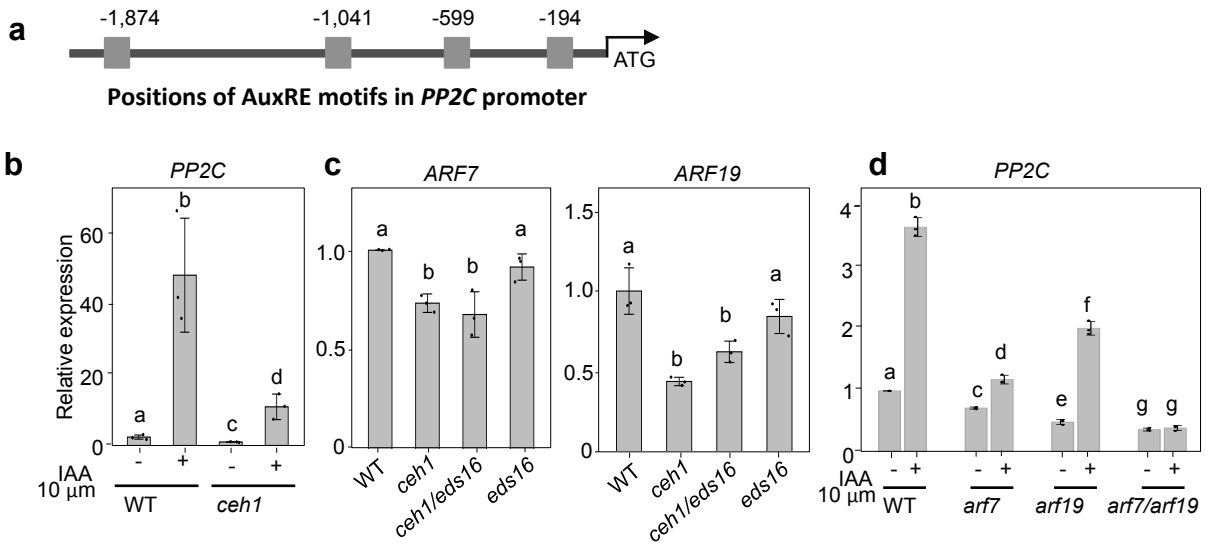

**Figure 2. Auxin induces *PP2C* expression**

(a) The schematic presentation of the *PP2C* promoter display the positions of auxin response elements (AuxRE). (b) Expression levels of *PP2C* an hour post mock- (-) and auxin (10 mM) -treatment (+) of *ceh1* and WT seedlings display enhanced expression in auxin-treated lines. (c) Reduced expression levels of auxin response factors (*ARF7* and *19*) in *ceh1* and *ceh1/eds16* compared to the levels in WT and *eds16* lines. (d) *PP2C* expression levels an hour post mock- (-) and auxin (10 mM)-treatment (+) of WT, single (*arf7*, and *arf19*) and double (*arf7/arf19*) mutant lines display indispensable function of *ARF7* and *19* in auxin-induction of *PP2C* expression. Statistical analyses were performed by two-tailed Student's *t* tests or ANOVA tests.

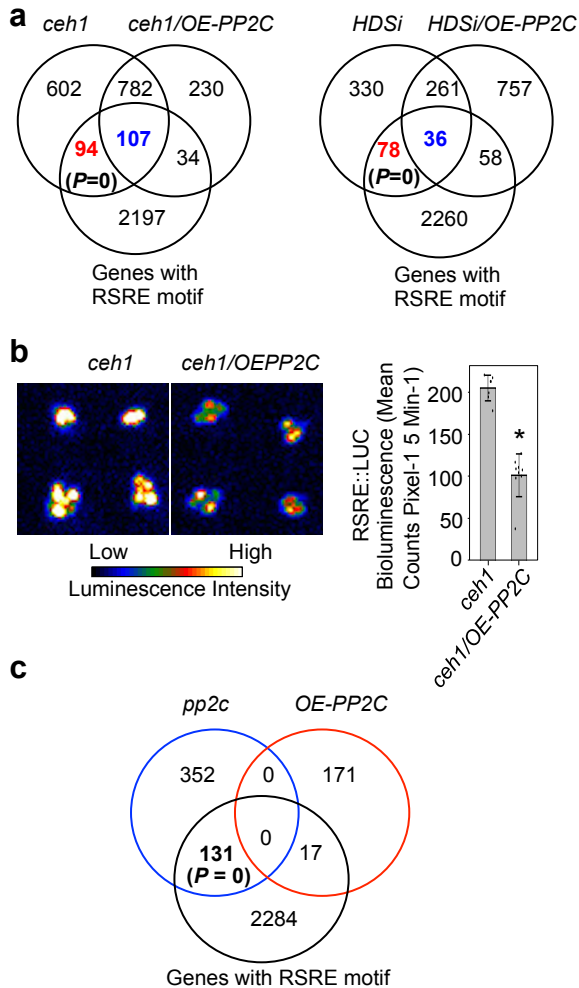

**Figure 3. PP2C suppresses the MEcPP-inducible SAR and RSRE-containing genes**

(a) Venn diagrams illustrate suppression of a significant number of MEcPP-inducible RSRE-motif containing genes in *PP2C* overexpressing (*ceh1/OE-PP2C* and *HDSi/OE-PP2C*) lines. (b) Representative images of *PP2C* overexpressing lines in the *ceh1* background (*ceh1/OE-PP2C*) show the notable reduction of RSRE: LUC activity compared to the *ceh1* mutant. The bar underneath displays the intensity of LUC activity and the histogram show quantification of LUC activity. Data are presented as means  $\pm$  SEM. Asterisk notes statistically significant differences ( $P \leq 0.05$ ) by using two-tailed Student's *t* test. (c) Venn diagrams illustrate enrichment of RSRE-motif containing genes whose expressions are significantly induced in the *pp2c* mutant but not in *OE-PP2C* plants under standard conditions.

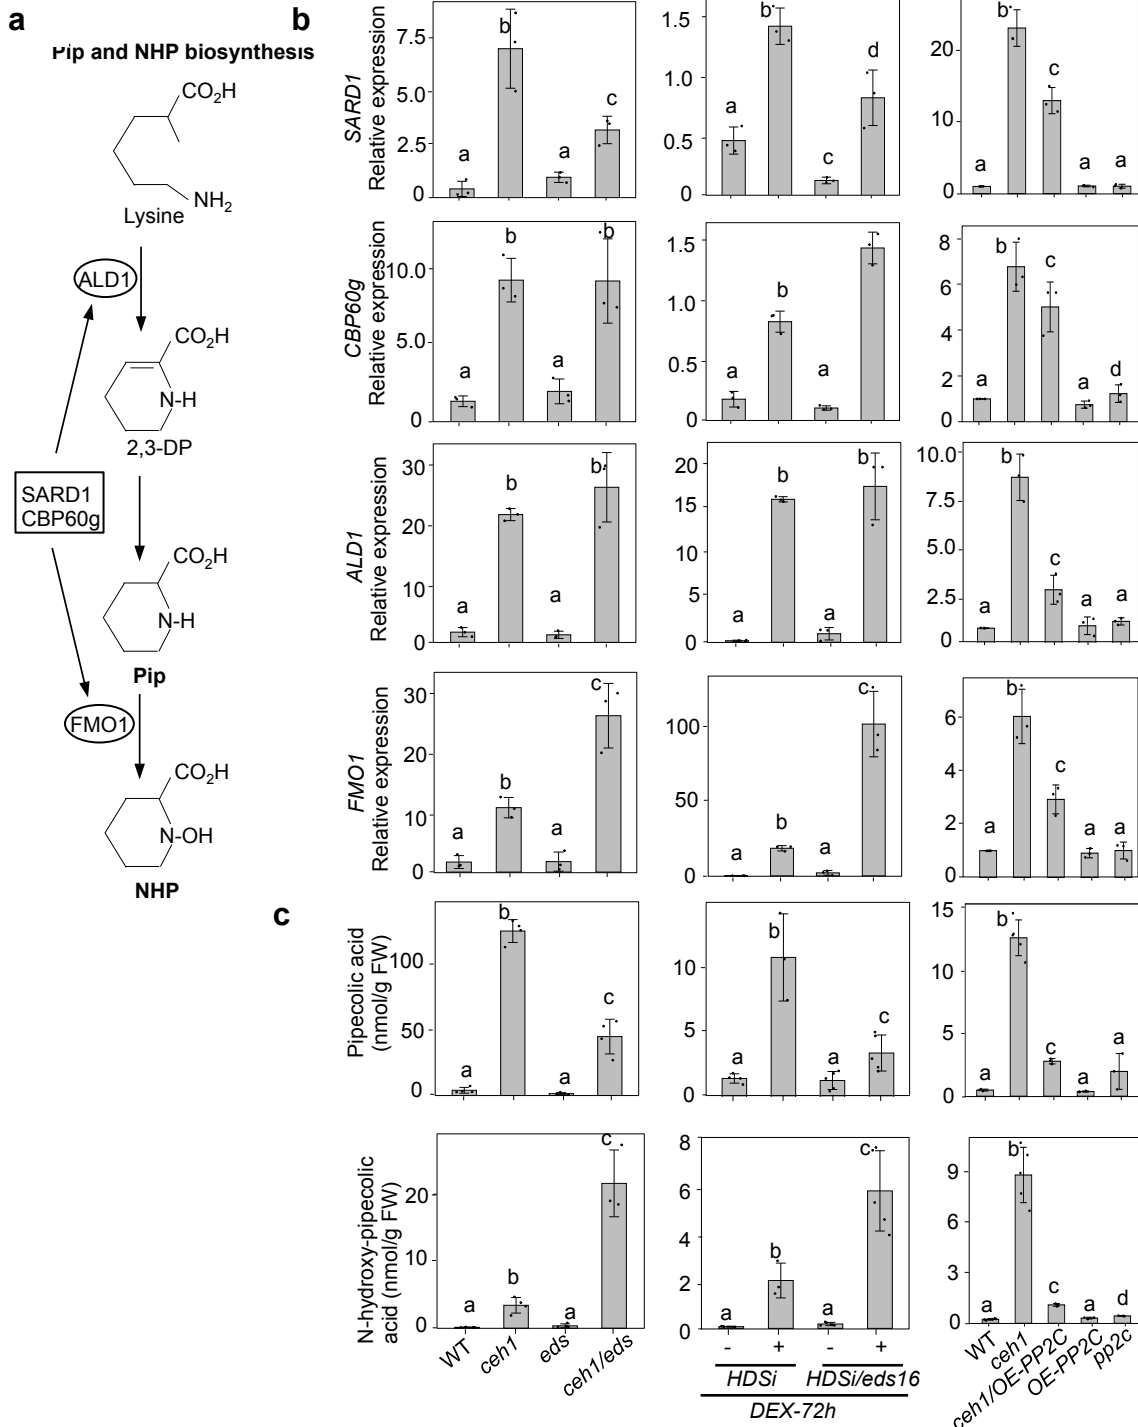

**Figure 4. PP2C suppresses transcription of Pip and NHP biosynthesis genes and corresponding metabolites**  
**(a)** Schematic presentation of pipelicolic acid (Pip) and N-hydroxy-pipelicolic acid (NHP) biosynthesis pathway. **(b)** Relative expression levels of *SARD1*, *CBP60g*, *ALD1* and *FMO1* in WT, *ceh1*, *eds16*, *ceh1/eds16*, and in mock (-) and post 72 h DEX-treated *HDSi* and *HDSi/eds16* lines, and in *PP2C* overexpression in the wild type (*OE-PP2C*) and the *ceh1* mutant (*ceh1/OE-PP2C*) backgrounds as well as in *pp2c* mutant, show reversion of SA- and MECPP-dependent induction of these genes in *PP2C* overexpressing lines. **(c)** Measurements of Pip and NHP metabolites in aforementioned genotypes confirm their MECPP- and SA-dependent alterations, and their reduced abundance in *PP2C* overexpression lines. All Data are mean  $\pm$  SD of three biological and three technical replicates. Lower case letters on top of histograms represent statistically significant differences ( $P \leq 0.05$ ) by using ANOVA test.

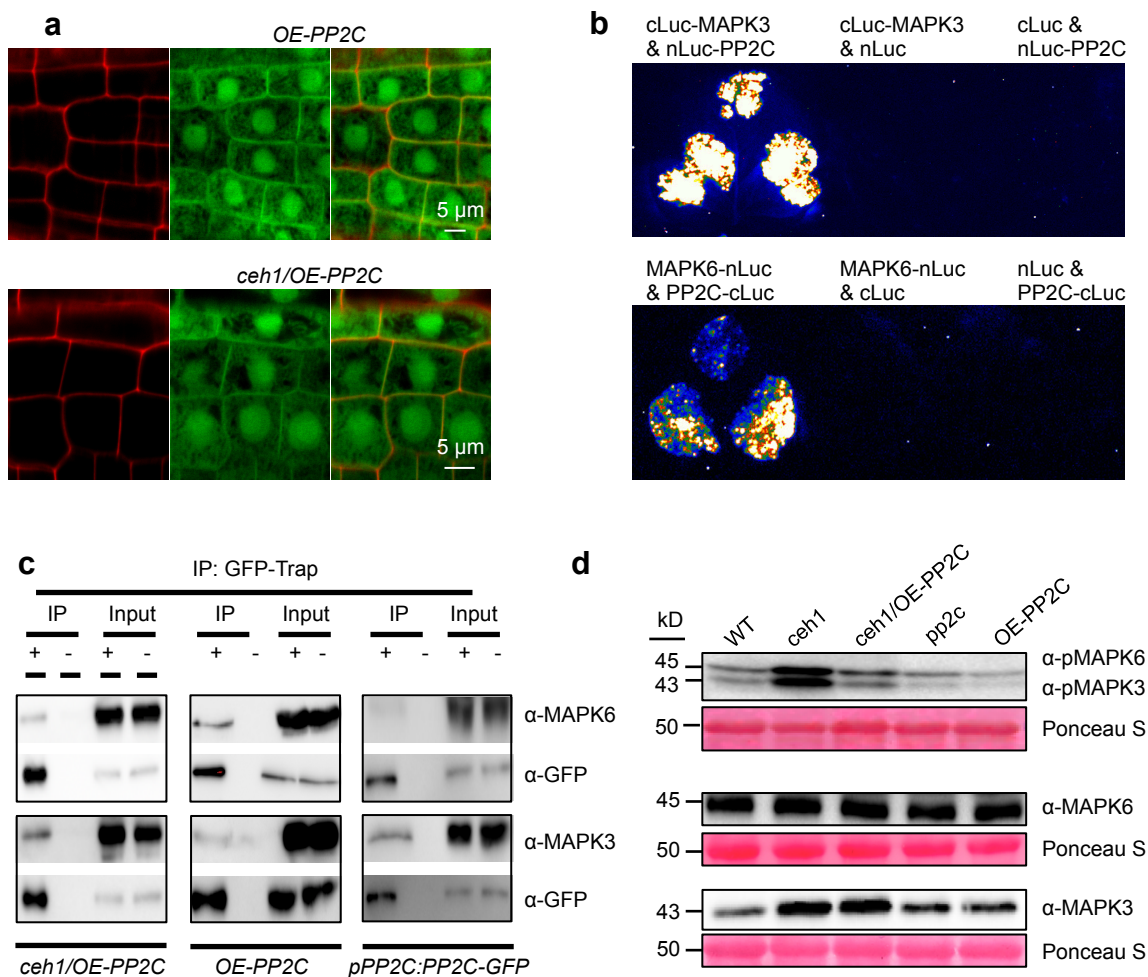

**Figure 5. MAPK3/6 phosphorylation levels and their physical interaction with PP2C**

(a) Confocal images of plasma membrane, cytosolic and nuclear localization of PP2C in the wild-type (*OE-PP2C*) and *ceh1* (*ceh1/OE-PP2C*) backgrounds overexpressing 35S::PP2C-GFP construct. (b) Representatives of split luciferase complementation assays in *Nicotiana benthamiana* displayed by dark-field images of leaves expressing cLuc-MAPK3 (C-terminal Luc fused with MAPK3) and nLuc-PP2C (N-terminal Luc fragment fused with PP2C) (upper panel) and MAPK6-nLuc (MAPK6 fused with N-terminal fragment of Luc) and PP2C-cLuc (PP2C fused with C-terminal fragment Luc) (lower panel). (c) The *in vivo* interaction of PP2C with MAPK3 and MAPK6 determined by co-immunoprecipitation assay. Protein samples obtained from *ceh1/OE-PP2C*, *OE-PP2C*, and *pPP2C:PP2C-GFP* seedlings grown under standard conditions were immunoprecipitated using GFP (+) and empty (-) magnetic beads. Immunoblots were analyzed using with  $\alpha$ -MAPK3 or  $\alpha$ -MAPK6. Each blot shows protein inputs before (input, right panels) and after (IP, left panels) immunoprecipitation. (d) Immunoblots show that *PP2C* overexpression in the *ceh1* mutant reverses the MECPP-mediated high phosphorylation of MAPK3 and MAPK6 ( $\alpha$ -pMAPK6 and  $\alpha$ -pMAPK3, top panels), without notable impact on the protein abundance of MAPK6 (middle panels) or MAPK3 (bottom panels). Ponceau S staining shows protein loading.



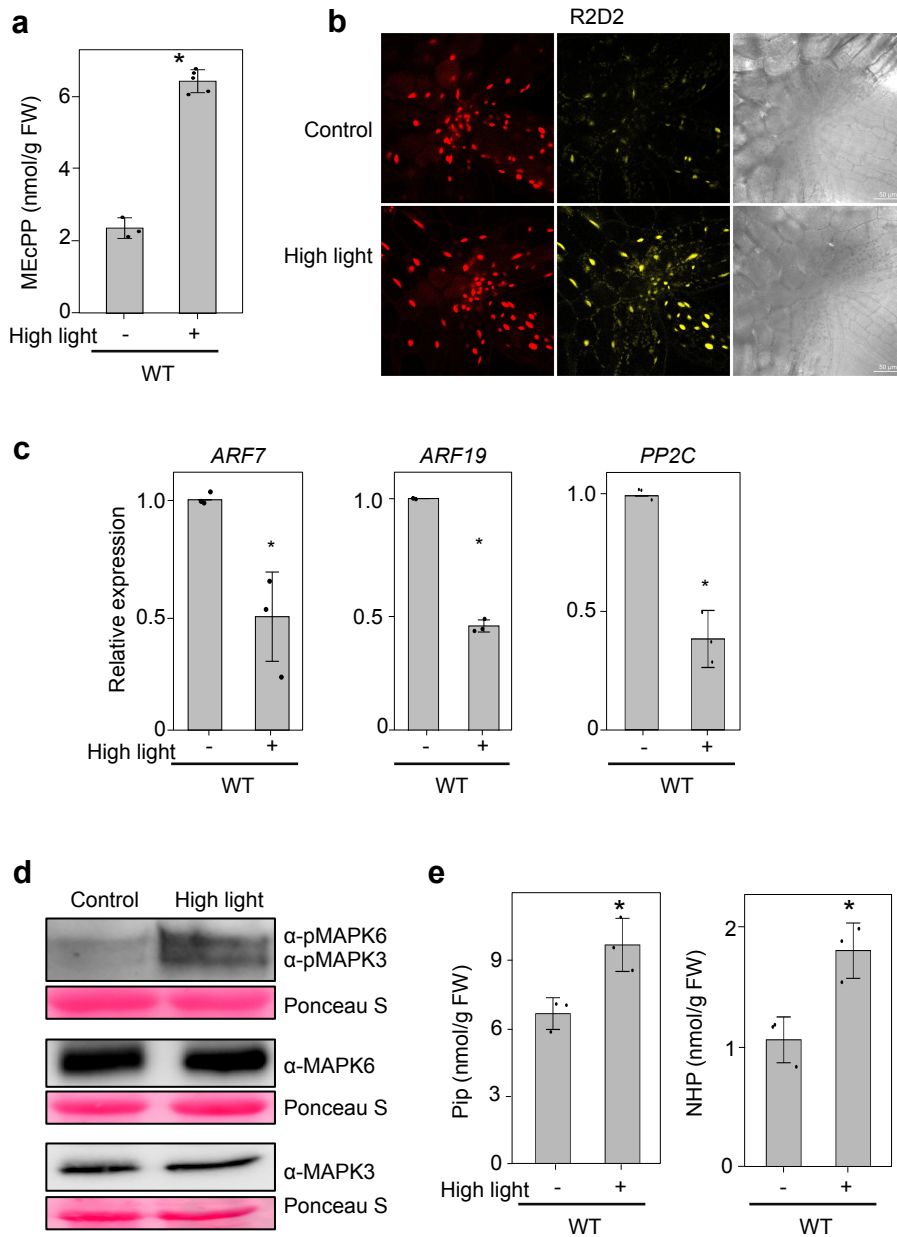

**Figure 6. High light induces MEcPP accumulation and enhances Pip and NHP abundance**

(a) Induction of MEcPP levels and (b) reduction of IAA abundance 90 min post high light ( $800 \mu\text{mol m}^{-2}\text{s}^{-1}$ , 90 min) treatment as measured by fluorescence of mDII-ntdTomato/DII-n3xVenus and the corresponding bright-field images of control and high light-treated auxin reporter R2D2 seedlings. (c) Relative expression levels of *ARF 7/ 19* and *PP2C* in high light-treated seedlings. (d) Immunoblot analyses of total and phosphorylated MAPK3/6 in high light-treated seedlings. Ponceau S show equal protein loading. (e) Enhanced levels of Pip and NHP metabolites in high light-treated seedlings. Two-tailed Student's *t* tests and ANOVA tests are used for the statistical analyses and the asterisk and different letters denote significance ( $P \leq 0.05$ ).

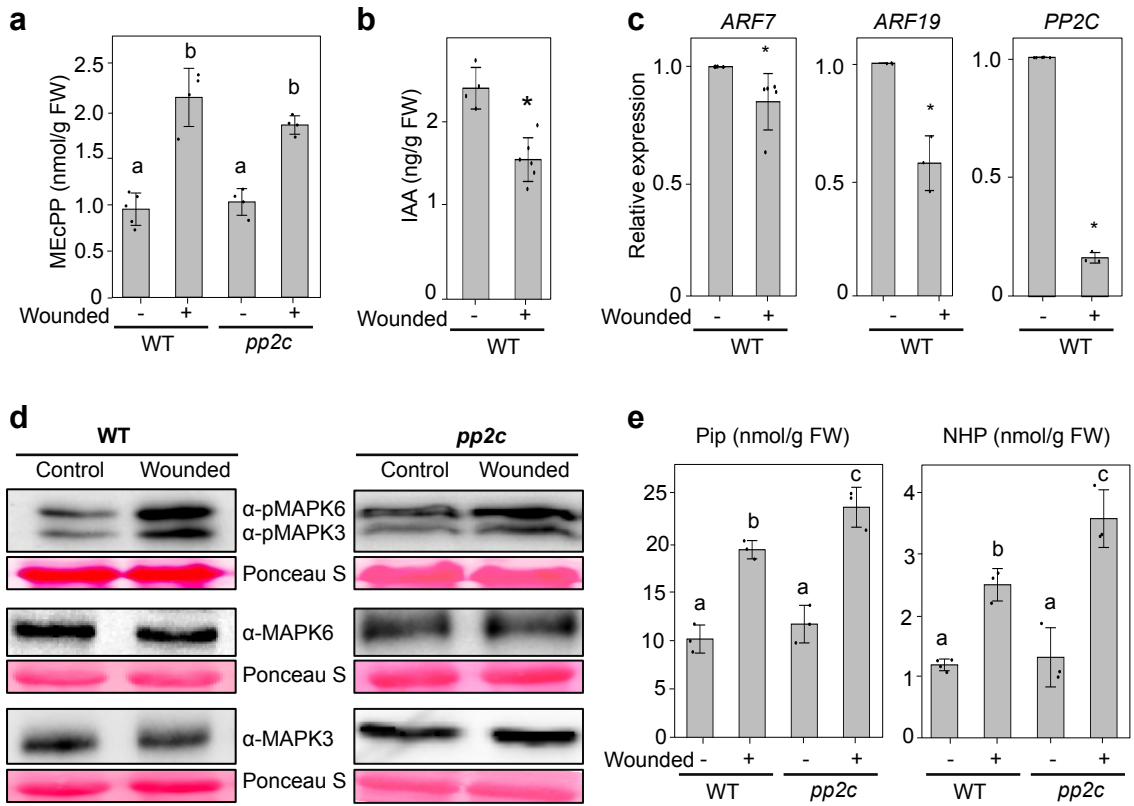

**Figure 7. Wounding induces MEcPP accumulation and enhances Pip and NHP abundance**

(a) Induction of MEcPP levels and (b) reduction of IAA abundance in 90 min post wounded WT and *pp2c* mutant seedlings compared to control unwounded plants. (c) Relative expression levels of *ARF 7/19* and *PP2C* in unwounded and wounded WT plants. (d) Immunoblot analyses of total and phosphorylated MAPK3/6 in unwounded and wounded WT and *pp2c* mutant seedlings. Ponceau S show equal protein loading. (e) Metabolic analyses of Pip and NHP in wounded and WT and *pp2c* mutant seedlings. Two-tailed Student's *t*-tests and ANOVA tests are used for the statistical analyses and the asterisk and different letters denote statistical significance ( $P \leq 0.05$ ).

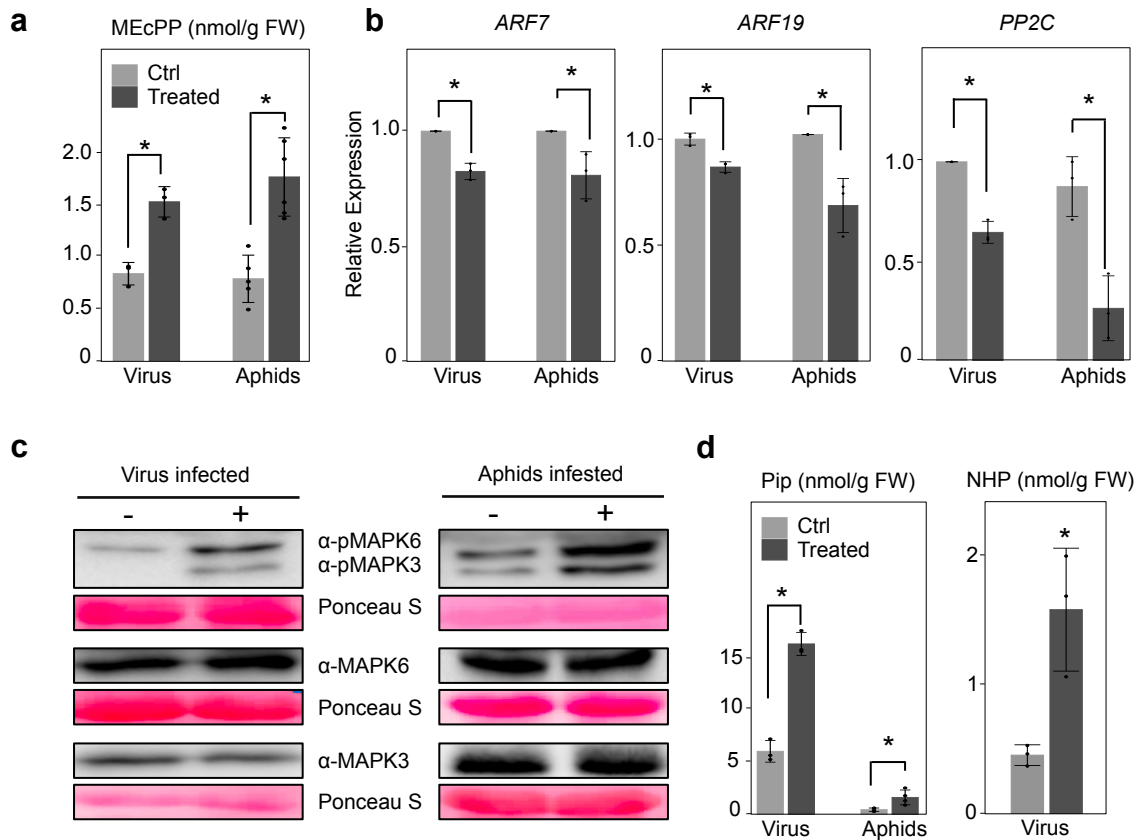

**Figure 8. Aphid infestation and viral infection induce MEcPP accumulation and enhance Pip and NHP abundance** (a) Induction of MEcPP post 2 weeks of cucumber mosaic virus (CMV-M2b) infection, and 24h aphid infestation in WT seedlings, and (b) suppression of *ARF 7/19* and *PP2C* expression in biotically challenged plants. (c) Immunoblot analyses of total and phosphorylated MAPK3/6 in mock (-) and virus/aphids (+) treated seedlings. Ponceau S show equal protein loading. (d) Metabolic analyses of Pip and NHP in mock (-) and virus/aphids (+) treated seedlings. The asterisk denotes statistical significance ( $P \leq 0.05$ ) by using two-tailed Student's *t*-tests.

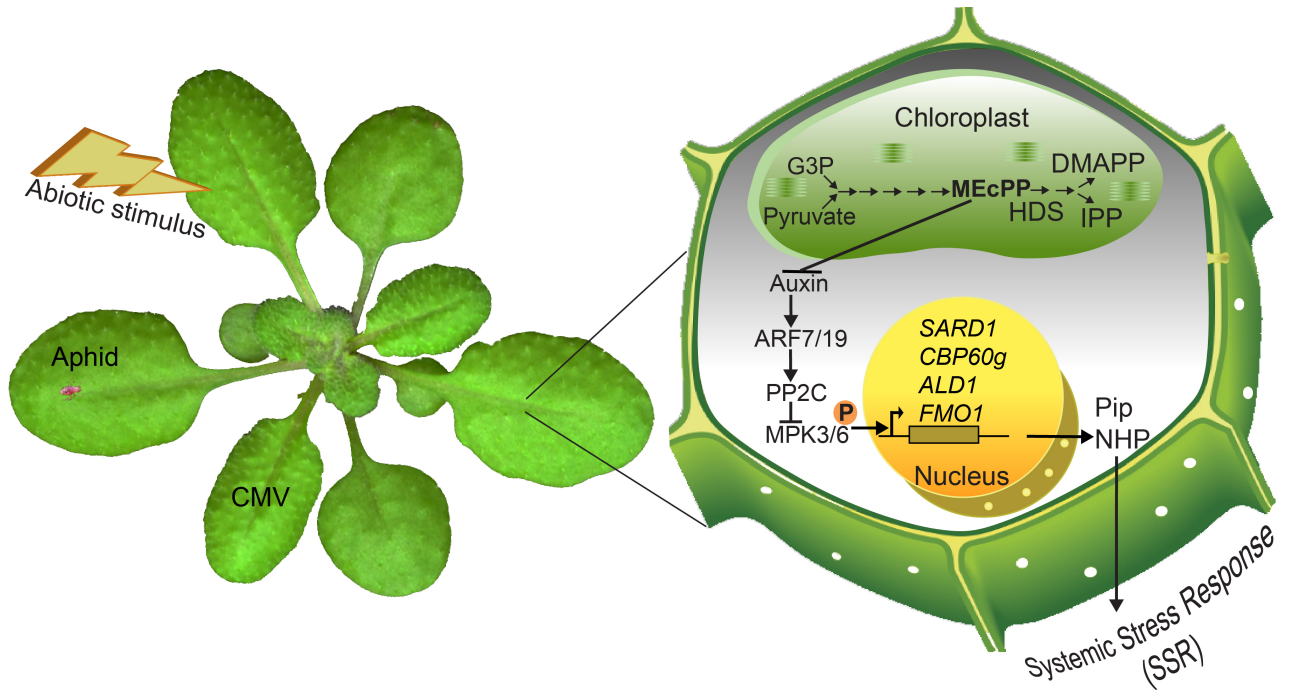

**Figure 9. Biotic and abiotic insults trigger the retrograde signaling cascade initiating SSR**

Schematic model depicting biotically and abiotically-induced MEcPP-accumulation mediates reduction of auxin abundance that lessens expression levels of the ARF7/19, the transcriptional activators of PP2C. This enables phosphorylation of MAPK3/6 required for induction of Pip and NHP biosynthesis genes and production of their respective metabolites key to activation of general SSR.
